# Supplementary material for: Secretome of Olfactory Mucosa Mesenchymal Stem Cell, a Multiple Potential Stem Cell
Source: Stem Cells Int. 2016 Feb 1;2016:1243659. doi: 10.1155/2016/1243659 (PMC4753338; doi:10.1155/2016/1243659)
Supplement: Supplementary file 1 — Proteins identified in three parallel tests by mass spectrum were shown in the supplementary table. As the result, a total of 274 nonredundant peoteins in OM-MSC conditioned medium were included in the table. [file 1243659.f1.xlsx]

## Sheet: 1
Accession	Description	Score	Coverage	# Proteins	# Unique Peptides	# Peptides	# PSMs	# AAs	MW [kDa]	calc. pI	TMHMM	GRAVY	function
A0A075B6H7	Protein IGKV3-7 (Fragment) OS=Homo sapiens GN=IGKV3-7 PE=4 SV=1 - [A0A075B6H7_HUMAN]	2.61	0.1552	2	1	1	1	116	12.8	5.25		-0.107
A0A075B6J0	Protein IGLV1-40 (Fragment) OS=Homo sapiens GN=IGLV1-40 PE=4 SV=1 - [A0A075B6J0_HUMAN]	3.23	0.2542	1	1	1	1	118	12.3	5.74		-0.196
A0A075B6J9	HCG1782423 (Fragment) OS=Homo sapiens GN=IGLV2-18 PE=4 SV=1 - [A0A075B6J9_HUMAN]	8.24	0.1083	1	1	1	3	120	12.7	5.91		-0.274
A0A075B6K4	HCG2043238 (Fragment) OS=Homo sapiens GN=IGLV3-10 PE=4 SV=1 - [A0A075B6K4_HUMAN]	7.92	0.2051	2	2	2	3	117	12.6	4.83		-0.314
A0A075B6K8	Ig lambda-1 chain C regions (Fragment) OS=Homo sapiens GN=IGLC1 PE=4 SV=1 - [A0A075B6K8_HUMAN]	16.29	0.4623	3	1	3	5	106	11.4	7.87		-0.516
A0A075B6L0	Ig lambda-2 chain C regions (Fragment) OS=Homo sapiens GN=IGLC3 PE=4 SV=1 - [A0A075B6L0_HUMAN]	25.06	0.5566	6	2	4	8	106	11.3	7.24		-0.435
A0A075B6N7	Ig alpha-2 chain C region (Fragment) OS=Homo sapiens GN=IGHA2 PE=4 SV=1 - [A0A075B6N7_HUMAN]	4.76	0.0706	3	2	2	2	340	36.6	6.27		-0.268
A0A075B6N8	Ig gamma-3 chain C region (Fragment) OS=Homo sapiens GN=IGHG3 PE=4 SV=1 - [A0A075B6N8_HUMAN]	4.96	0.0584	2	1	2	2	377	41.3	7.9		-0.516
A0A075B6R9	Protein IGKV2D-24 (Fragment) OS=Homo sapiens GN=IGKV2D-24 PE=4 SV=1 - [A0A075B6R9_HUMAN]	2.97	0.1083	1	1	1	1	120	13.1	8.87		-0.048
A0A075B7B8	Protein IGHV3OR16-12 (Fragment) OS=Homo sapiens GN=IGHV3OR16-12 PE=4 SV=1 - [A0A075B7B8_HUMAN]	2.85	0.094	3	1	1	1	117	12.9	6.51		0.006
A2RUR9-2	Isoform 2 of Coiled-coil domain-containing protein 144A OS=Homo sapiens GN=CCDC144A - [C144A_HUMAN]	2.3	0.0188	4	1	1	1	691	81.4	6.95		-0.989
A6NNA5	Dorsal root ganglia homeobox protein OS=Homo sapiens GN=DRGX PE=2 SV=1 - [DRGX_HUMAN]	2.27	0.0418	2	1	1	1	263	28.7	8.46		-0.613
A6PW80	Elongation factor 1-alpha 1 (Fragment) OS=Homo sapiens GN=EEF1A1 PE=4 SV=2 - [A6PW80_HUMAN]	3.85	0.1415	5	1	1	1	106	12	9.16		-0.403
B1AKG0	Complement factor H-related protein 1 OS=Homo sapiens GN=CFHR1 PE=4 SV=1 - [B1AKG0_HUMAN]	5.63	0.0959	3	1	2	2	271	30.8	7.81		-0.503
B3KVZ3	Centromere protein H OS=Homo sapiens GN=CENPH PE=1 SV=1 - [B3KVZ3_HUMAN]	2.87	0.0526	2	1	1	1	228	26.2	4.93		-0.636
B4E1Z4	Uncharacterized protein OS=Homo sapiens PE=2 SV=1 - [B4E1Z4_HUMAN]	30.05	0.0506	12	5	5	8	1266	140.9	7.18		-0.464
C9J7L4	Solute carrier family 13 member 3 (Fragment) OS=Homo sapiens GN=SLC13A3 PE=4 SV=2 - [C9J7L4_HUMAN]	2.65	0.0392	4	1	1	1	408	45.7	7.72		0.282
C9J7L8	Acyl-coenzyme A thioesterase 9, mitochondrial OS=Homo sapiens GN=ACOT9 PE=1 SV=1 - [C9J7L8_HUMAN]	2.26	0.1324	5	1	1	1	136	15.5	8.59		-0.235
C9JA68	Serpin B7 (Fragment) OS=Homo sapiens GN=SERPINB7 PE=4 SV=2 - [C9JA68_HUMAN]	2.53	0.1024	5	1	1	1	127	13.9	5.02		-0.201
C9JD84	Latent-transforming growth factor beta-binding protein 1 OS=Homo sapiens GN=LTBP1 PE=1 SV=1 - [C9JD84_HUMAN]	8.83	0.0216	9	2	2	3	1340	146.9	4.91		-0.47
C9JEV0	Zinc-alpha-2-glycoprotein OS=Homo sapiens GN=AZGP1 PE=3 SV=1 - [C9JEV0_HUMAN]	15.16	0.2159	3	3	3	5	227	26.3	5.73		-0.628
C9JHP4	Eukaryotic translation initiation factor 3 subunit L (Fragment) OS=Homo sapiens GN=EIF3L PE=1 SV=1 - [C9JHP4_HUMAN]	3.17	0.1933	1	1	1	1	150	17.7	5.02		-0.574
C9JXX4	Insulin-like growth factor-binding protein 5 (Fragment) OS=Homo sapiens GN=IGFBP5 PE=4 SV=1 - [C9JXX4_HUMAN]	5.53	0.1288	2	2	2	2	233	25.5	7.31		-0.467
D6RBJ7	Vitamin D-binding protein OS=Homo sapiens GN=GC PE=1 SV=1 - [D6RBJ7_HUMAN]	5.59	0.0661	5	2	2	2	348	38.8	5.5		-0.29
D6RD17	Immunoglobulin J chain (Fragment) OS=Homo sapiens GN=IGJ PE=1 SV=2 - [D6RD17_HUMAN]	8.69	0.0955	2	1	1	3	157	18	5.6		-0.402
D6RE86	Ceruloplasmin (Fragment) OS=Homo sapiens GN=CP PE=4 SV=2 - [D6RE86_HUMAN]	2.77	0.0674	3	1	1	1	178	20.7	7.24		-0.548
D6REX5	Selenoprotein P (Fragment) OS=Homo sapiens GN=SEPP1 PE=4 SV=1 - [D6REX5_HUMAN]	4.73	0.0323	2	1	1	2	310	35.1	7.66		-0.581
D6RF35	Vitamin D-binding protein OS=Homo sapiens GN=GC PE=1 SV=1 - [D6RF35_HUMAN]	66.36	0.3571	6	11	11	20	476	53	5.52		-0.359
D6RFL4	Monocyte differentiation antigen CD14, urinary form (Fragment) OS=Homo sapiens GN=CD14 PE=4 SV=1 - [D6RFL4_HUMAN]	18.26	0.1737	2	2	2	5	213	23.3	5.26		0.066
E5RGE1	14-3-3 protein zeta/delta (Fragment) OS=Homo sapiens GN=YWHAZ PE=1 SV=2 - [E5RGE1_HUMAN]	2.54	0.2745	7	1	1	1	51	5.8	4.78		-0.64
E5RIR0	Fatty acid-binding protein, adipocyte OS=Homo sapiens GN=FABP4 PE=1 SV=1 - [E5RIR0_HUMAN]	4.91	0.3077	4	1	1	2	39	4.6	4.44		-0.315
E7ENY8	Collagen alpha-1(III) chain OS=Homo sapiens GN=COL3A1 PE=4 SV=1 - [E7ENY8_HUMAN]	2.67	0.0103	3	1	1	1	1163	111.9	5.88
E7ESS4	Intercellular adhesion molecule 1 OS=Homo sapiens GN=ICAM1 PE=1 SV=1 - [E7ESS4_HUMAN]	5.15	0.0452	2	1	1	2	310	33.7	8.68		-0.266
E9PBC5	Plasma kallikrein heavy chain OS=Homo sapiens GN=KLKB1 PE=3 SV=1 - [E9PBC5_HUMAN]	2.73	0.0236	3	1	1	1	552	61.8	8.31		-0.18
E9PBW4	Hemoglobin subunit gamma-2 OS=Homo sapiens GN=HBG2 PE=1 SV=1 - [E9PBW4_HUMAN]	6.03	0.2117	5	1	2	2	137	15.3	9.47		0.105
E9PFZ2	Ceruloplasmin OS=Homo sapiens GN=CP PE=4 SV=1 - [E9PFZ2_HUMAN]	46.57	0.1374	5	9	9	14	946	108.8	5.77		-0.55
E9PHK0	Tetranectin OS=Homo sapiens GN=CLEC3B PE=4 SV=1 - [E9PHK0_HUMAN]	2.69	0.075	2	1	1	1	160	17.8	5.05		-0.371
E9PI87	Oxidoreductase HTATIP2 OS=Homo sapiens GN=HTATIP2 PE=1 SV=1 - [E9PI87_HUMAN]	2.25	0.051	3	1	1	1	196	22	7.4		-0.344
E9PIT3	Thrombin light chain OS=Homo sapiens GN=F2 PE=3 SV=1 - [E9PIT3_HUMAN]	21.79	0.1458	3	5	5	7	583	65.4	5.71		-0.535
E9PN25	Heat shock cognate 71 kDa protein (Fragment) OS=Homo sapiens GN=HSPA8 PE=1 SV=1 - [E9PN25_HUMAN]	2.4	0.0985	17	1	1	1	132	14.6	6.55		-0.37
F5GXS0	Complement C4-B OS=Homo sapiens GN=C4B PE=4 SV=1 - [F5GXS0_HUMAN]	16.94	0.0312	4	4	4	6	1698	187.6	7.33		-0.263
F5GY03	SPARC (Fragment) OS=Homo sapiens GN=SPARC PE=4 SV=1 - [F5GY03_HUMAN]	6.43	0.094	2	2	2	2	149	17.5	6.28		-0.651
F5H2Z5	Complement C1r subcomponent-like protein OS=Homo sapiens GN=C1RL PE=4 SV=1 - [F5H2Z5_HUMAN]	2.71	0.1273	3	1	1	1	110	11.7	9.03		-0.437
F8VV32	Lysozyme C OS=Homo sapiens GN=LYZ PE=1 SV=1 - [F8VV32_HUMAN]	3.45	0.1154	2	1	1	1	104	11.5	9.07		-0.167
F8VYK9	Insulin-like growth factor-binding protein 6 OS=Homo sapiens GN=IGFBP6 PE=4 SV=1 - [F8VYK9_HUMAN]	5.53	0.1765	3	2	2	2	238	25.1	7.81		-0.72
F8W6P5	LVV-hemorphin-7 (Fragment) OS=Homo sapiens GN=HBB PE=1 SV=1 - [F8W6P5_HUMAN]	5.79	0.3222	10	2	2	2	90	9.7	6.79		-0.007
F8W7L3	Alpha-2-macroglobulin (Fragment) OS=Homo sapiens GN=A2M PE=1 SV=1 - [F8W7L3_HUMAN]	2.94	0.0714	2	1	1	1	168	18.7	6.54		0.07
F8WAS2	Inter-alpha-trypsin inhibitor heavy chain H1 OS=Homo sapiens GN=ITIH1 PE=4 SV=1 - [F8WAS2_HUMAN]	4.8	0.108	2	2	2	2	213	23.4	9.57		-0.123
F8WCZ6	Complement C1s subcomponent OS=Homo sapiens GN=C1S PE=3 SV=1 - [F8WCZ6_HUMAN]	16.24	0.0864	2	4	4	6	521	57.5	5.45		-0.427
F8WE04	Heat shock protein beta-1 OS=Homo sapiens GN=HSPB1 PE=1 SV=1 - [F8WE04_HUMAN]	2.77	0.0538	2	1	1	1	186	20.4	9.06		-0.413
G3XAM2	Complement factor I light chain OS=Homo sapiens GN=CFI PE=3 SV=1 - [G3XAM2_HUMAN]	2.66	0.0174	3	1	1	1	576	65	7.5		-0.331
G5E9R0	Actin, cytoplasmic 1 OS=Homo sapiens GN=ACTB PE=1 SV=1 - [G5E9R0_HUMAN]	11.45	0.224	29	2	2	4	125	13.8	5.49		-0.442
H0Y7L5	Apolipoprotein E (Fragment) OS=Homo sapiens GN=APOE PE=1 SV=2 - [H0Y7L5_HUMAN]	21.94	0.2416	4	5	5	7	269	30.6	7.94		-0.651
H0Y7Z1	Ugl-Y3 (Fragment) OS=Homo sapiens GN=FN1 PE=1 SV=1 - [H0Y7Z1_HUMAN]	5.51	0.0136	14	1	1	2	1103	120.7	5.8		-0.483
H0YAS8	Clusterin beta chain (Fragment) OS=Homo sapiens GN=CLU PE=4 SV=1 - [H0YAS8_HUMAN]	7.8	0.2929	7	3	3	3	140	16.2	6.01		-0.736
H0YEF4	Palmitoyltransferase (Fragment) OS=Homo sapiens GN=ZDHHC5 PE=1 SV=1 - [H0YEF4_HUMAN]	3.15	0.05	3	1	1	1	300	32.9	8.97		-0.792
H0YF21	MAP7 domain-containing protein 1 (Fragment) OS=Homo sapiens GN=MAP7D1 PE=1 SV=1 - [H0YF21_HUMAN]	2.16	0.0565	4	1	1	1	248	27.5	9.98		-1.647
H0YJV3	Nidogen-2 (Fragment) OS=Homo sapiens GN=NID2 PE=4 SV=1 - [H0YJV3_HUMAN]	2.26	0.0155	3	1	1	1	644	71.9	5.96		-0.575
H0YLE2	Annexin A2 (Fragment) OS=Homo sapiens GN=ANXA2 PE=4 SV=1 - [H0YLE2_HUMAN]	2.44	0.2222	15	1	1	1	45	5.3	4.5		-0.718
H7C0L5	Inter-alpha-trypsin inhibitor heavy chain H4 (Fragment) OS=Homo sapiens GN=ITIH4 PE=1 SV=1 - [H7C0L5_HUMAN]	3.22	0.0181	6	1	1	1	719	80	5.45		-0.319
H7C0N0	Inter-alpha-trypsin inhibitor heavy chain H1 (Fragment) OS=Homo sapiens GN=ITIH1 PE=4 SV=1 - [H7C0N0_HUMAN]	2.33	0.028	4	1	1	1	464	51.8	6.19		-0.434
H7C282	FERM domain-containing protein 5 (Fragment) OS=Homo sapiens GN=FRMD5 PE=4 SV=1 - [H7C282_HUMAN]	2.38	0.1092	6	1	1	1	119	14	6.3		-0.409
I3L1Q6	Phosphatidylcholine-sterol acyltransferase (Fragment) OS=Homo sapiens GN=LCAT PE=4 SV=1 - [I3L1Q6_HUMAN]	4.71	0.1308	3	1	1	2	107	11	7.24		-0.277
I3L1U9	Actin, cytoplasmic 2, N-terminally processed (Fragment) OS=Homo sapiens GN=ACTG1 PE=1 SV=1 - [I3L1U9_HUMAN]	4.89	0.0935	29	2	2	2	214	23.8	5.44		-0.229
I3L3H7	Collagen alpha-1(I) chain (Fragment) OS=Homo sapiens GN=COL1A1 PE=4 SV=1 - [I3L3H7_HUMAN]	3.7	0.0779	2	1	1	1	154	16.4	5.69		-0.743
I3L4N7	Pigment epithelium-derived factor (Fragment) OS=Homo sapiens GN=SERPINF1 PE=3 SV=1 - [I3L4N7_HUMAN]	2.58	0.0725	2	1	1	1	138	15.9	6.15		-0.138
I6L894	Ankyrin-2 OS=Homo sapiens GN=ANK2 PE=1 SV=1 - [I6L894_HUMAN]	10.32	0.0038	2	1	1	3	3924	430	5.12		-0.682
J3QSA3	Ubiquitin (Fragment) OS=Homo sapiens GN=UBB PE=4 SV=1 - [J3QSA3_HUMAN]	3.18	0.3721	22	1	1	1	43	4.9	5.19		-0.533
K7EPJ9	Keratin, type I cytoskeletal 17 (Fragment) OS=Homo sapiens GN=KRT17 PE=1 SV=1 - [K7EPJ9_HUMAN]	10.55	0.1602	14	1	4	4	231	24.9	4.92		-0.494
K7ERI9	Truncated apolipoprotein C-I (Fragment) OS=Homo sapiens GN=APOC1 PE=4 SV=1 - [K7ERI9_HUMAN]	5.74	0.1429	2	1	1	2	77	8.6	6.71		-0.079
M0R009	Alpha-1B-glycoprotein (Fragment) OS=Homo sapiens GN=A1BG PE=4 SV=2 - [M0R009_HUMAN]	8.79	0.0721	3	2	2	3	305	33.3	6.27		-0.355
O14791-3	Isoform 3 of Apolipoprotein L1 OS=Homo sapiens GN=APOL1 - [APOL1_HUMAN]	6.62	0.0395	3	1	1	2	380	42.1	5.8		-0.239
O43790	Keratin, type II cuticular Hb6 OS=Homo sapiens GN=KRT86 PE=1 SV=1 - [KRT86_HUMAN]	18.48	0.1132	8	5	5	6	486	53.5	5.66		-0.333
O43866	CD5 antigen-like OS=Homo sapiens GN=CD5L PE=1 SV=1 - [CD5L_HUMAN]	13.23	0.1037	1	3	3	4	347	38.1	5.47		-0.443	immune
O75882-3	Isoform 3 of Attractin OS=Homo sapiens GN=ATRN - [ATRN_HUMAN]	2.4	0.0083	3	1	1	1	1198	133.6	6.98		-0.278	immune/neural
O76009	Keratin, type I cuticular Ha3-I OS=Homo sapiens GN=KRT33A PE=2 SV=2 - [KT33A_HUMAN]	10.83	0.099	2	1	3	4	404	45.9	4.82		-0.583
O76013	Keratin, type I cuticular Ha6 OS=Homo sapiens GN=KRT36 PE=1 SV=1 - [KRT36_HUMAN]	11.06	0.0749	7	2	3	4	467	52.2	4.94		-0.372
O95445-2	Isoform 2 of Apolipoprotein M OS=Homo sapiens GN=APOM - [APOM_HUMAN]	8.23	0.2759	3	3	3	3	116	13	7.75		-0.259
P00734	Prothrombin OS=Homo sapiens GN=F2 PE=1 SV=2 - [THRB_HUMAN]	80.06	0.3023	3	13	13	24	622	70	5.9		-0.539	blood/inflammation
P00738-2	Isoform 2 of Haptoglobin OS=Homo sapiens GN=HP - [HPT_HUMAN]	16.07	0.1527	8	5	5	5	347	38.4	6.6		-0.421
P00747	Plasminogen OS=Homo sapiens GN=PLG PE=1 SV=2 - [PLMN_HUMAN]	2.2	0.0136	1	1	1	1	810	90.5	7.24		-0.688	inflammation/antiangiogenesis
P00748	Coagulation factor XII OS=Homo sapiens GN=F12 PE=1 SV=3 - [FA12_HUMAN]	3.07	0.0293	1	1	1	1	615	67.7	7.74		-0.411	blood
P00751-2	Isoform 2 of Complement factor B OS=Homo sapiens GN=CFB - [CFAB_HUMAN]	6.75	0.0403	4	2	2	2	621	68.8	6.57		-0.501	cell proliferation
P01008	Antithrombin-III OS=Homo sapiens GN=SERPINC1 PE=1 SV=1 - [ANT3_HUMAN]	15.73	0.1121	1	4	4	6	464	52.6	6.71		-0.278	blood
P01009	Alpha-1-antitrypsin OS=Homo sapiens GN=SERPINA1 PE=1 SV=3 - [A1AT_HUMAN]	63.27	0.3995	7	18	18	21	418	46.7	5.59		-0.183	blood
P01009-2	Isoform 2 of Alpha-1-antitrypsin OS=Homo sapiens GN=SERPINA1 - [A1AT_HUMAN]	117.54	0.5097	7	19	19	36	359	40.2	5.47		-0.183
P01011	Alpha-1-antichymotrypsin OS=Homo sapiens GN=SERPINA3 PE=1 SV=2 - [AACT_HUMAN]	22.45	0.156	3	5	5	7	423	47.6	5.52		-0.065	blood
P01019	Angiotensinogen OS=Homo sapiens GN=AGT PE=1 SV=1 - [ANGT_HUMAN]	3.69	0.0247	1	1	1	1	485	53.1	6.32		0.065	blood
P01023	Alpha-2-macroglobulin OS=Homo sapiens GN=A2M PE=1 SV=3 - [A2MG_HUMAN]	78.4	0.173	5	21	21	28	1474	163.2	6.46		-0.195
P01024	Complement C3 OS=Homo sapiens GN=C3 PE=1 SV=2 - [CO3_HUMAN]	41.42	0.0842	4	10	10	14	1663	187	6.4		-0.32	inflammation
P01042-3	Isoform 3 of Kininogen-1 OS=Homo sapiens GN=KNG1 - [KNG1_HUMAN]	3.5	0.0332	2	1	1	1	391	43.8	6.43		-0.757	blood
P01593	Ig kappa chain V-I region AG OS=Homo sapiens PE=1 SV=1 - [KV101_HUMAN]	22.17	0.3148	10	2	2	5	108	12	5.99		-0.505
P01594	Ig kappa chain V-I region AU OS=Homo sapiens PE=1 SV=1 - [KV102_HUMAN]	41.44	0.3148	6	1	2	10	108	11.9	5.33		-0.466
P01596	Ig kappa chain V-I region CAR OS=Homo sapiens PE=1 SV=1 - [KV104_HUMAN]	8.82	0.1682	2	1	1	2	107	11.7	9.41		-0.349
P01597	Ig kappa chain V-I region DEE OS=Homo sapiens PE=1 SV=1 - [KV105_HUMAN]	12.61	0.1667	1	1	1	3	108	11.7	9.36		-0.322
P01601	Ig kappa chain V-I region HK101 (Fragment) OS=Homo sapiens PE=4 SV=1 - [KV109_HUMAN]	5.51	0.1368	1	1	1	2	117	12.8	8.16		-0.113
P01604	Ig kappa chain V-I region Kue OS=Homo sapiens PE=1 SV=1 - [KV112_HUMAN]	2.69	0.1019	1	1	1	1	108	12.1	8.81		-0.548
P01609	Ig kappa chain V-I region Scw OS=Homo sapiens PE=1 SV=1 - [KV117_HUMAN]	41.52	0.2778	6	1	2	10	108	11.8	6		-0.545
P01610	Ig kappa chain V-I region WEA OS=Homo sapiens PE=1 SV=1 - [KV118_HUMAN]	41.46	0.3056	6	1	2	10	108	11.8	8.91		-0.444
P01611	Ig kappa chain V-I region Wes OS=Homo sapiens PE=1 SV=1 - [KV119_HUMAN]	9.71	0.1667	1	1	1	2	108	11.6	7.28		-0.24
P01612	Ig kappa chain V-I region Mev OS=Homo sapiens PE=1 SV=1 - [KV120_HUMAN]	16.81	0.1651	1	1	1	5	109	11.9	6.57		-0.423
P01613	Ig kappa chain V-I region Ni OS=Homo sapiens PE=1 SV=1 - [KV121_HUMAN]	37.48	0.3036	1	2	2	10	112	12.2	5.36		-0.324
P01617	Ig kappa chain V-II region TEW OS=Homo sapiens PE=1 SV=1 - [KV204_HUMAN]	2.91	0.2124	1	1	1	1	113	12.3	6		-0.21
P01619	Ig kappa chain V-III region B6 OS=Homo sapiens PE=1 SV=1 - [KV301_HUMAN]	3.23	0.1481	1	1	1	1	108	11.6	9.25		-0.298
P01620	Ig kappa chain V-III region SIE OS=Homo sapiens PE=1 SV=1 - [KV302_HUMAN]	9.52	0.2477	6	2	2	3	109	11.8	8.48		-0.435
P01625	Ig kappa chain V-IV region Len OS=Homo sapiens PE=1 SV=2 - [KV402_HUMAN]	9.62	0.2368	4	2	2	3	114	12.6	7.93		-0.467
P01714	Ig lambda chain V-III region SH OS=Homo sapiens PE=1 SV=1 - [LV301_HUMAN]	6.91	0.1667	1	1	1	2	108	11.4	6.52		-0.436
P01717	Ig lambda chain V-IV region Hil OS=Homo sapiens PE=1 SV=1 - [LV403_HUMAN]	11.3	0.1776	1	1	1	3	107	11.5	6.51		-0.393
P01719	Ig lambda chain V-V region DEL OS=Homo sapiens PE=1 SV=1 - [LV501_HUMAN]	3.83	0.1481	1	1	1	1	108	11.3	5.36		-0.325
P01765	Ig heavy chain V-III region TIL OS=Homo sapiens PE=1 SV=1 - [HV304_HUMAN]	7.13	0.1652	4	1	1	2	115	12.3	9.13		-0.123
P01766	Ig heavy chain V-III region BRO OS=Homo sapiens PE=1 SV=1 - [HV305_HUMAN]	6.45	0.25	4	2	2	2	120	13.2	6.57		-0.188
P01777	Ig heavy chain V-III region TEI OS=Homo sapiens PE=1 SV=1 - [HV316_HUMAN]	4.29	0.1597	2	1	1	1	119	12.8	8.5		0.027
P01834	Ig kappa chain C region OS=Homo sapiens GN=IGKC PE=1 SV=1 - [IGKC_HUMAN]	17.05	0.5189	2	3	3	5	106	11.6	5.87		-0.5
P01857	Ig gamma-1 chain C region OS=Homo sapiens GN=IGHG1 PE=1 SV=1 - [IGHG1_HUMAN]	32.11	0.2152	3	4	5	10	330	36.1	8.19		-0.428
P01859	Ig gamma-2 chain C region OS=Homo sapiens GN=IGHG2 PE=1 SV=2 - [IGHG2_HUMAN]	13.1	0.1104	2	2	3	5	326	35.9	7.59		-0.419
P01871	Ig mu chain C region OS=Homo sapiens GN=IGHM PE=1 SV=3 - [IGHM_HUMAN]	8.95	0.0686	4	2	2	3	452	49.3	6.77		-0.326
P01876	Ig alpha-1 chain C region OS=Homo sapiens GN=IGHA1 PE=1 SV=2 - [IGHA1_HUMAN]	64.29	0.3711	1	6	8	18	353	37.6	6.51		-0.206
P01877	Ig alpha-2 chain C region OS=Homo sapiens GN=IGHA2 PE=1 SV=3 - [IGHA2_HUMAN]	12.83	0.0941	2	1	2	4	340	36.5	6.1		-0.243
P01880	Ig delta chain C region OS=Homo sapiens GN=IGHD PE=1 SV=2 - [IGHD_HUMAN]	5.7	0.0911	2	2	2	2	384	42.2	7.93		-0.555
P02042	Hemoglobin subunit delta OS=Homo sapiens GN=HBD PE=1 SV=2 - [HBD_HUMAN]	31.03	0.4014	5	1	5	10	147	16	8.05		-0.046
P02452	Collagen alpha-1(I) chain OS=Homo sapiens GN=COL1A1 PE=1 SV=5 - [CO1A1_HUMAN]	133.26	0.25	2	20	20	37	1464	138.9	5.8		-0.788
P02533	Keratin, type I cytoskeletal 14 OS=Homo sapiens GN=KRT14 PE=1 SV=4 - [K1C14_HUMAN]	22.97	0.178	20	3	7	8	472	51.5	5.16		-0.537
P02647	Apolipoprotein A-I OS=Homo sapiens GN=APOA1 PE=1 SV=1 - [APOA1_HUMAN]	44.19	0.397	2	11	11	15	267	30.8	5.76		-0.717
P02649	Apolipoprotein E OS=Homo sapiens GN=APOE PE=1 SV=1 - [APOE_HUMAN]	91.23	0.4574	4	14	14	27	317	36.1	5.73		-0.596
P02656	Apolipoprotein C-III OS=Homo sapiens GN=APOC3 PE=1 SV=1 - [APOC3_HUMAN]	7.79	0.1616	2	1	1	2	99	10.8	5.41		-0.086
P02743	Serum amyloid P-component OS=Homo sapiens GN=APCS PE=1 SV=2 - [SAMP_HUMAN]	2.74	0.0448	1	1	1	1	223	25.4	6.54		-0.078
P02749	Beta-2-glycoprotein 1 OS=Homo sapiens GN=APOH PE=1 SV=3 - [APOH_HUMAN]	21.66	0.1275	4	3	3	7	345	38.3	7.97		-0.274
P02750	Leucine-rich alpha-2-glycoprotein OS=Homo sapiens GN=LRG1 PE=1 SV=2 - [A2GL_HUMAN]	2.94	0.0288	1	1	1	1	347	38.2	6.95		-0.144
P02751-12	Isoform 12 of Fibronectin OS=Homo sapiens GN=FN1 - [FINC_HUMAN]	20.21	0.0264	18	3	3	6	2008	221.2	6.18		-0.543
P02751-5	Isoform 5 of Fibronectin OS=Homo sapiens GN=FN1 - [FINC_HUMAN]	41.21	0.0683	18	9	9	13	2211	243.2	5.74		-0.543
P02760	Protein AMBP OS=Homo sapiens GN=AMBP PE=1 SV=1 - [AMBP_HUMAN]	2.53	0.0313	1	1	1	1	352	39	6.25		-0.299
P02763	Alpha-1-acid glycoprotein 1 OS=Homo sapiens GN=ORM1 PE=1 SV=1 - [A1AG1_HUMAN]	22.57	0.2189	1	3	5	8	201	23.5	5.02		-0.536
P02765	Alpha-2-HS-glycoprotein OS=Homo sapiens GN=AHSG PE=1 SV=1 - [FETUA_HUMAN]	24.57	0.1471	2	4	4	8	367	39.3	5.72		-0.196
P02766	Transthyretin OS=Homo sapiens GN=TTR PE=1 SV=1 - [TTHY_HUMAN]	11.6	0.0952	1	2	2	3	147	15.9	5.76		-0.029
P02768	Serum albumin OS=Homo sapiens GN=ALB PE=1 SV=2 - [ALBU_HUMAN]	365.41	0.6026	7	41	41	115	609	69.3	6.28		-0.354
P02774-2	Isoform 2 of Vitamin D-binding protein OS=Homo sapiens GN=GC - [VTDB_HUMAN]	14.45	0.0511	4	1	1	4	352	39.5	5.26		-0.346
P02787	Serotransferrin OS=Homo sapiens GN=TF PE=1 SV=3 - [TRFE_HUMAN]	146.23	0.4026	6	28	28	46	698	77	7.12		-0.336
P02790	Hemopexin OS=Homo sapiens GN=HPX PE=1 SV=2 - [HEMO_HUMAN]	8.57	0.0844	1	3	3	3	462	51.6	7.02		-0.434
P03952	Plasma kallikrein OS=Homo sapiens GN=KLKB1 PE=1 SV=1 - [KLKB1_HUMAN]	10.96	0.0721	4	4	4	4	638	71.3	8.22		-0.263
P04004	Vitronectin OS=Homo sapiens GN=VTN PE=1 SV=1 - [VTNC_HUMAN]	16.31	0.1423	1	5	5	6	478	54.3	5.8		-0.723
P04053-2	Isoform 2 of DNA nucleotidylexotransferase OS=Homo sapiens GN=DNTT - [TDT_HUMAN]	2.42	0.0256	2	1	1	1	508	58.4	8.43		-0.409
P04114	Apolipoprotein B-100 OS=Homo sapiens GN=APOB PE=1 SV=2 - [APOB_HUMAN]	5.24	0.0059	2	2	2	2	4563	515.3	7.05	1	-0.296
P04196	Histidine-rich glycoprotein OS=Homo sapiens GN=HRG PE=1 SV=1 - [HRG_HUMAN]	17.22	0.0667	1	3	3	6	525	59.5	7.5		-0.957
P04208	Ig lambda chain V-I region WAH OS=Homo sapiens PE=1 SV=1 - [LV106_HUMAN]	3.18	0.1009	1	1	1	1	109	11.7	6.54		-0.333
P04217	Alpha-1B-glycoprotein OS=Homo sapiens GN=A1BG PE=1 SV=4 - [A1BG_HUMAN]	42.49	0.2566	3	6	6	13	495	54.2	5.86		-0.217
P04220	Ig mu heavy chain disease protein OS=Homo sapiens PE=1 SV=1 - [MUCB_HUMAN]	3.64	0.0384	4	1	1	1	391	43	5.24		-0.407
P04264	Keratin, type II cytoskeletal 1 OS=Homo sapiens GN=KRT1 PE=1 SV=6 - [K2C1_HUMAN]	77.27	0.2888	2	14	17	26	644	66	8.12		-0.626
P04430	Ig kappa chain V-I region BAN OS=Homo sapiens PE=1 SV=1 - [KV122_HUMAN]	3.55	0.1667	1	1	1	1	108	11.8	8.44		-0.39
P04433	Ig kappa chain V-III region VG (Fragment) OS=Homo sapiens PE=1 SV=1 - [KV309_HUMAN]	2.49	0.0783	1	1	1	1	115	12.6	4.96		-0.111
P05067-10	Isoform APP639 of Amyloid beta A4 protein OS=Homo sapiens GN=APP - [A4_HUMAN]	5.99	0.025	11	1	1	2	639	72.5	4.82		-0.584
P05090	Apolipoprotein D OS=Homo sapiens GN=APOD PE=1 SV=1 - [APOD_HUMAN]	5.21	0.1164	2	2	2	2	189	21.3	5.15		-0.053
P05121	Plasminogen activator inhibitor 1 OS=Homo sapiens GN=SERPINE1 PE=1 SV=1 - [PAI1_HUMAN]	2.6	0.0249	1	1	1	1	402	45	7.2		-0.059
P05154	Plasma serine protease inhibitor OS=Homo sapiens GN=SERPINA5 PE=1 SV=3 - [IPSP_HUMAN]	34.13	0.1872	7	6	6	11	406	45.6	9.26		-0.115
P05155-2	Isoform 2 of Plasma protease C1 inhibitor OS=Homo sapiens GN=SERPING1 - [IC1_HUMAN]	48.64	0.2031	6	9	9	17	448	49.7	6.54		-0.125
P05546	Heparin cofactor 2 OS=Homo sapiens GN=SERPIND1 PE=1 SV=3 - [HEP2_HUMAN]	2.44	0.018	1	1	1	1	499	57	6.9		-0.236
P05997	Collagen alpha-2(V) chain OS=Homo sapiens GN=COL5A2 PE=1 SV=3 - [CO5A2_HUMAN]	9.72	0.0307	1	3	3	4	1499	144.8	6.46		-0.813
P06396-2	Isoform 2 of Gelsolin OS=Homo sapiens GN=GSN - [GELS_HUMAN]	46.26	0.1409	7	6	6	13	731	80.6	5.85		-0.415
P06727	Apolipoprotein A-IV OS=Homo sapiens GN=APOA4 PE=1 SV=3 - [APOA4_HUMAN]	15.68	0.1364	1	5	5	6	396	45.4	5.38		-0.796
P07357	Complement component C8 alpha chain OS=Homo sapiens GN=C8A PE=1 SV=2 - [CO8A_HUMAN]	3.17	0.0291	1	1	1	1	584	65.1	6.47		-0.516
P07359	Platelet glycoprotein Ib alpha chain OS=Homo sapiens GN=GP1BA PE=1 SV=2 - [GP1BA_HUMAN]	6.44	0.0368	1	2	2	2	652	71.5	6.29	1	-0.198
P08123	Collagen alpha-2(I) chain OS=Homo sapiens GN=COL1A2 PE=1 SV=7 - [CO1A2_HUMAN]	171.12	0.3529	1	30	30	53	1366	129.2	8.95		-0.648
P08185	Corticosteroid-binding globulin OS=Homo sapiens GN=SERPINA6 PE=1 SV=1 - [CBG_HUMAN]	32.31	0.2469	3	7	7	10	405	45.1	6.04		0.112
P08519	Apolipoprotein(a) OS=Homo sapiens GN=LPA PE=1 SV=1 - [APOA_HUMAN]	68.92	0.3824	1	11	11	22	4548	501	5.88		-0.725
P08572	Collagen alpha-2(IV) chain OS=Homo sapiens GN=COL4A2 PE=1 SV=4 - [CO4A2_HUMAN]	4.54	0.0099	1	1	1	2	1712	167.4	8.66	1	-0.584
P08603	Complement factor H OS=Homo sapiens GN=CFH PE=1 SV=4 - [CFAH_HUMAN]	65.5	0.1535	5	13	13	22	1231	139	6.61		-0.603
P08697	Alpha-2-antiplasmin OS=Homo sapiens GN=SERPINF2 PE=1 SV=3 - [A2AP_HUMAN]	8.94	0.0692	4	3	3	3	491	54.5	6.29		-0.124
P08779	Keratin, type I cytoskeletal 16 OS=Homo sapiens GN=KRT16 PE=1 SV=4 - [K1C16_HUMAN]	31.46	0.2283	21	4	9	11	473	51.2	5.05		-0.517
P0C0L4-2	Isoform 2 of Complement C4-A OS=Homo sapiens GN=C4A - [CO4A_HUMAN]	40.01	0.0595	2	1	6	11	1698	187.6	7.12		-0.252
P10643	Complement component C7 OS=Homo sapiens GN=C7 PE=1 SV=2 - [CO7_HUMAN]	2.78	0.0178	1	1	1	1	843	93.5	6.48		-0.486
P10909-4	Isoform 4 of Clusterin OS=Homo sapiens GN=CLU - [CLUS_HUMAN]	19.84	0.1659	14	5	5	6	416	48.8	6.71		-0.665
P11021	78 kDa glucose-regulated protein OS=Homo sapiens GN=HSPA5 PE=1 SV=2 - [GRP78_HUMAN]	2.39	0.0214	1	1	1	1	654	72.3	5.16		-0.487
P11047	Laminin subunit gamma-1 OS=Homo sapiens GN=LAMC1 PE=1 SV=3 - [LAMC1_HUMAN]	33.11	0.074	1	10	10	11	1609	177.5	5.12		-0.487
P11226	Mannose-binding protein C OS=Homo sapiens GN=MBL2 PE=1 SV=2 - [MBL2_HUMAN]	2.64	0.0524	1	1	1	1	248	26.1	5.49		-0.427
P12109	Collagen alpha-1(VI) chain OS=Homo sapiens GN=COL6A1 PE=1 SV=3 - [CO6A1_HUMAN]	35.17	0.0798	1	6	6	10	1028	108.5	5.43		-0.525
P12110	Collagen alpha-2(VI) chain OS=Homo sapiens GN=COL6A2 PE=1 SV=4 - [CO6A2_HUMAN]	7.28	0.0393	3	3	3	3	1019	108.5	6.21		-0.624
P12259	Coagulation factor V OS=Homo sapiens GN=F5 PE=1 SV=4 - [FA5_HUMAN]	2.69	0.0045	1	1	1	1	2224	251.5	6.05		-0.599
P13645	Keratin, type I cytoskeletal 10 OS=Homo sapiens GN=KRT10 PE=1 SV=6 - [K1C10_HUMAN]	41.71	0.2038	11	9	12	14	584	58.8	5.21		-0.624
P13647	Keratin, type II cytoskeletal 5 OS=Homo sapiens GN=KRT5 PE=1 SV=3 - [K2C5_HUMAN]	11.94	0.0593	10	2	3	4	590	62.3	7.74		-0.428
P13671	Complement component C6 OS=Homo sapiens GN=C6 PE=1 SV=3 - [CO6_HUMAN]	2.64	0.0118	1	1	1	1	934	104.7	6.76		-0.594
P14151	L-selectin OS=Homo sapiens GN=SELL PE=1 SV=2 - [LYAM1_HUMAN]	2.43	0.0215	2	1	1	1	372	42.2	6.6	1	-0.37
P14923	Junction plakoglobin OS=Homo sapiens GN=JUP PE=1 SV=3 - [PLAK_HUMAN]	20.19	0.0966	5	6	6	7	745	81.7	6.14		-0.157
P15814	Immunoglobulin lambda-like polypeptide 1 OS=Homo sapiens GN=IGLL1 PE=1 SV=1 - [IGLL1_HUMAN]	3.12	0.0704	1	1	1	1	213	22.9	10.07		-0.434
P15924	Desmoplakin OS=Homo sapiens GN=DSP PE=1 SV=3 - [DESP_HUMAN]	30.64	0.0411	3	11	11	12	2871	331.6	6.81		-0.823
P16035	Metalloproteinase inhibitor 2 OS=Homo sapiens GN=TIMP2 PE=1 SV=2 - [TIMP2_HUMAN]	3.33	0.0909	1	1	1	1	220	24.4	7.49		-0.197
P17936	Insulin-like growth factor-binding protein 3 OS=Homo sapiens GN=IGFBP3 PE=1 SV=2 - [IBP3_HUMAN]	3.1	0.0584	2	1	1	1	291	31.7	8.69		-0.535
P18065	Insulin-like growth factor-binding protein 2 OS=Homo sapiens GN=IGFBP2 PE=1 SV=2 - [IBP2_HUMAN]	15.95	0.1138	3	3	3	5	325	34.8	7.5		-0.44
P19652	Alpha-1-acid glycoprotein 2 OS=Homo sapiens GN=ORM2 PE=1 SV=2 - [A1AG2_HUMAN]	18.94	0.209	1	3	5	7	201	23.6	5.11		-0.583
P21810	Biglycan OS=Homo sapiens GN=BGN PE=1 SV=2 - [PGS1_HUMAN]	13.35	0.1141	2	4	4	5	368	41.6	7.52		-0.249
P22692	Insulin-like growth factor-binding protein 4 OS=Homo sapiens GN=IGFBP4 PE=1 SV=2 - [IBP4_HUMAN]	10.05	0.1124	1	2	2	3	258	27.9	7.15		-0.493
P22792	Carboxypeptidase N subunit 2 OS=Homo sapiens GN=CPN2 PE=1 SV=3 - [CPN2_HUMAN]	3.16	0.0294	1	1	1	1	545	60.5	5.99		0.068
P25311	Zinc-alpha-2-glycoprotein OS=Homo sapiens GN=AZGP1 PE=1 SV=2 - [ZA2G_HUMAN]	16.25	0.1879	2	4	4	5	298	34.2	6.05		-0.576
P27169	Serum paraoxonase/arylesterase 1 OS=Homo sapiens GN=PON1 PE=1 SV=3 - [PON1_HUMAN]	2.94	0.0451	1	1	1	1	355	39.7	5.22		-0.091
P29622	Kallistatin OS=Homo sapiens GN=SERPINA4 PE=1 SV=3 - [KAIN_HUMAN]	5.27	0.0281	1	1	1	2	427	48.5	7.75		-0.069
P31431-2	Isoform 2 of Syndecan-4 OS=Homo sapiens GN=SDC4 - [SDC4_HUMAN]	2.47	0.0784	2	1	1	1	153	16.5	4.22	1	-0.133
P35052-2	Isoform 2 of Glypican-1 OS=Homo sapiens GN=GPC1 - [GPC1_HUMAN]	5.86	0.0488	4	1	1	2	287	31.9	7.02		-0.346
P35442	Thrombospondin-2 OS=Homo sapiens GN=THBS2 PE=1 SV=2 - [TSP2_HUMAN]	2.81	0.0119	1	1	1	1	1172	129.9	4.83		-0.647
P35527	Keratin, type I cytoskeletal 9 OS=Homo sapiens GN=KRT9 PE=1 SV=3 - [K1C9_HUMAN]	36.5	0.1782	2	7	7	11	623	62	5.24		-0.701
P35542	Serum amyloid A-4 protein OS=Homo sapiens GN=SAA4 PE=1 SV=2 - [SAA4_HUMAN]	5.58	0.1615	1	2	2	2	130	14.7	9.07		-0.519
P35555	Fibrillin-1 OS=Homo sapiens GN=FBN1 PE=1 SV=3 - [FBN1_HUMAN]	3.03	0.0045	1	1	1	1	2871	312	4.93		-0.422
P35556	Fibrillin-2 OS=Homo sapiens GN=FBN2 PE=1 SV=3 - [FBN2_HUMAN]	2.78	0.0045	1	1	1	1	2912	314.6	4.86	1	-0.38
P35858	Insulin-like growth factor-binding protein complex acid labile subunit OS=Homo sapiens GN=IGFALS PE=1 SV=1 - [ALS_HUMAN]	2.56	0.0264	2	1	1	1	605	66	6.79		-0.064
P35908	Keratin, type II cytoskeletal 2 epidermal OS=Homo sapiens GN=KRT2 PE=1 SV=2 - [K22E_HUMAN]	24.49	0.1455	2	5	7	8	639	65.4	8		-0.471
P36955	Pigment epithelium-derived factor OS=Homo sapiens GN=SERPINF1 PE=1 SV=4 - [PEDF_HUMAN]	20.01	0.2153	9	6	6	7	418	46.3	6.38		-0.164
P36980-2	Isoform Short of Complement factor H-related protein 2 OS=Homo sapiens GN=CFHR2 - [FHR2_HUMAN]	5.94	0.107	3	1	2	2	243	27.9	6.92		-0.595
P40197	Platelet glycoprotein V OS=Homo sapiens GN=GP5 PE=1 SV=1 - [GPV_HUMAN]	7.07	0.0286	1	1	1	2	560	60.9	9.63	1	0.131
P43652	Afamin OS=Homo sapiens GN=AFM PE=1 SV=1 - [AFAM_HUMAN]	6.85	0.0384	1	2	2	3	599	69	5.9		-0.388
P47929	Galectin-7 OS=Homo sapiens GN=LGALS7 PE=1 SV=2 - [LEG7_HUMAN]	2.19	0.0809	1	1	1	1	136	15.1	7.62		-0.343
P48668	Keratin, type II cytoskeletal 6C OS=Homo sapiens GN=KRT6C PE=1 SV=3 - [K2C6C_HUMAN]	21.56	0.1383	23	4	7	8	564	60	8		-0.432
P48740-4	Isoform 4 of Mannan-binding lectin serine protease 1 OS=Homo sapiens GN=MASP1 - [MASP1_HUMAN]	2.52	0.0163	2	1	1	1	615	68.9	5.34		-0.406
P51884	Lumican OS=Homo sapiens GN=LUM PE=1 SV=2 - [LUM_HUMAN]	7.51	0.0828	1	3	3	3	338	38.4	6.61		-0.276
P52746	Zinc finger protein 142 OS=Homo sapiens GN=ZNF142 PE=2 SV=4 - [ZN142_HUMAN]	2.19	0.0053	1	1	1	1	1687	187.8	7.91		-0.752
P52823	Stanniocalcin-1 OS=Homo sapiens GN=STC1 PE=1 SV=1 - [STC1_HUMAN]	2.87	0.0445	1	1	1	1	247	27.6	7.99		-0.333
P54868-3	Isoform 3 of Hydroxymethylglutaryl-CoA synthase, mitochondrial OS=Homo sapiens GN=HMGCS2 - [HMCS2_HUMAN]	3.07	0.0397	3	1	1	1	453	50	7.4		-0.317
P55268	Laminin subunit beta-2 OS=Homo sapiens GN=LAMB2 PE=1 SV=2 - [LAMB2_HUMAN]	3	0.0111	1	1	1	1	1798	195.9	6.52		-0.461
P55290	Cadherin-13 OS=Homo sapiens GN=CDH13 PE=1 SV=1 - [CAD13_HUMAN]	7.68	0.0365	5	2	2	3	713	78.2	4.98		-0.184
P55290-5	Isoform 5 of Cadherin-13 OS=Homo sapiens GN=CDH13 - [CAD13_HUMAN]	2.96	0.0178	3	1	1	1	674	73.7	4.83		-0.184
P60174-4	Isoform 4 of Triosephosphate isomerase OS=Homo sapiens GN=TPI1 - [TPIS_HUMAN]	2.6	0.0719	3	1	1	1	167	17.9	5.58		-0.167
P60709	Actin, cytoplasmic 1 OS=Homo sapiens GN=ACTB PE=1 SV=1 - [ACTB_HUMAN]	11.39	0.1173	30	3	3	4	375	41.7	5.48		-0.2
P62805	Histone H4 OS=Homo sapiens GN=HIST1H4A PE=1 SV=2 - [H4_HUMAN]	2.31	0.0971	1	1	1	1	103	11.4	11.36		-0.521
P67936	Tropomyosin alpha-4 chain OS=Homo sapiens GN=TPM4 PE=1 SV=3 - [TPM4_HUMAN]	6.63	0.1129	39	2	2	2	248	28.5	4.69		-1.021
P68871	Hemoglobin subunit beta OS=Homo sapiens GN=HBB PE=1 SV=2 - [HBB_HUMAN]	9.07	0.2381	10	3	3	3	147	16	7.28		0.014
P69905	Hemoglobin subunit alpha OS=Homo sapiens GN=HBA1 PE=1 SV=2 - [HBA_HUMAN]	9.71	0.1056	1	1	1	3	142	15.2	8.68		0.048
P80108	Phosphatidylinositol-glycan-specific phospholipase D OS=Homo sapiens GN=GPLD1 PE=1 SV=3 - [PHLD_HUMAN]	7.88	0.0476	1	3	3	3	840	92.3	6.37		-0.13
P80748	Ig lambda chain V-III region LOI OS=Homo sapiens PE=1 SV=1 - [LV302_HUMAN]	3.63	0.1441	3	1	1	1	111	11.9	5.08		-0.407
P81605	Dermcidin OS=Homo sapiens GN=DCD PE=1 SV=2 - [DCD_HUMAN]	2.82	0.1	2	1	1	1	110	11.3	6.54		-0.225
Q02413	Desmoglein-1 OS=Homo sapiens GN=DSG1 PE=1 SV=2 - [DSG1_HUMAN]	26	0.04	2	4	4	8	1049	113.7	5.03		-0.277
Q02818	Nucleobindin-1 OS=Homo sapiens GN=NUCB1 PE=1 SV=4 - [NUCB1_HUMAN]	7.72	0.0499	2	2	2	3	461	53.8	5.25		-1.009
Q08554-2	Isoform 1B of Desmocollin-1 OS=Homo sapiens GN=DSC1 - [DSC1_HUMAN]	6.7	0.0214	2	1	1	2	840	93.8	5.53	1	-0.442
Q12841-2	Isoform 2 of Follistatin-related protein 1 OS=Homo sapiens GN=FSTL1 - [FSTL1_HUMAN]	2.81	0.044	2	1	1	1	273	31.2	5.59		-0.617
Q12913-2	Isoform 2 of Receptor-type tyrosine-protein phosphatase eta OS=Homo sapiens GN=PTPRJ - [PTPRJ_HUMAN]	8.86	0.0965	2	3	3	3	539	57.2	5.6		-0.317
Q13790	Apolipoprotein F OS=Homo sapiens GN=APOF PE=1 SV=2 - [APOF_HUMAN]	14.36	0.0828	1	2	2	4	326	35.4	5.64		-0.071
Q13835-2	Isoform 1 of Plakophilin-1 OS=Homo sapiens GN=PKP1 - [PKP1_HUMAN]	11.22	0.0702	2	4	4	4	726	80.4	8.97		-0.563
Q14112-2	Isoform 2 of Nidogen-2 OS=Homo sapiens GN=NID2 - [NID2_HUMAN]	2.6	0.0133	2	1	1	1	1274	140.8	5.33		-0.496
Q14118	Dystroglycan OS=Homo sapiens GN=DAG1 PE=1 SV=2 - [DAG1_HUMAN]	7.18	0.0235	1	1	1	2	895	97.4	8.56	1	-0.374
Q14624-3	Isoform 3 of Inter-alpha-trypsin inhibitor heavy chain H4 OS=Homo sapiens GN=ITIH4 - [ITIH4_HUMAN]	12.65	0.0511	6	3	3	4	900	99.8	6.47		-0.315
Q14624-4	Isoform 4 of Inter-alpha-trypsin inhibitor heavy chain H4 OS=Homo sapiens GN=ITIH4 - [ITIH4_HUMAN]	30.46	0.0852	6	7	7	10	845	93.8	6.51		-0.315
Q15323	Keratin, type I cuticular Ha1 OS=Homo sapiens GN=KRT31 PE=2 SV=3 - [K1H1_HUMAN]	12.24	0.1034	9	1	4	5	416	47.2	4.88		-0.547
Q15648-3	Isoform 2 of Mediator of RNA polymerase II transcription subunit 1 OS=Homo sapiens GN=MED1 - [MED1_HUMAN]	2.88	0.0414	2	1	1	1	556	61.5	7.8		-0.677
Q16099	Glutamate receptor ionotropic, kainate 4 OS=Homo sapiens GN=GRIK4 PE=2 SV=2 - [GRIK4_HUMAN]	2.64	0.0167	1	1	1	1	956	107.2	6.73	4	-0.047
Q16270-2	Isoform 2 of Insulin-like growth factor-binding protein 7 OS=Homo sapiens GN=IGFBP7 - [IBP7_HUMAN]	20.53	0.1792	2	3	3	6	279	28.8	8.12		-0.225
Q1JUQ5	Peptidyl-prolyl cis-trans isomerase OS=Homo sapiens GN=FKBP12-Exip2 PE=1 SV=1 - [Q1JUQ5_HUMAN]	2.85	0.1522	3	1	1	1	92	10.1	5.9		-0.355
Q5HY54	Filamin-A OS=Homo sapiens GN=FLNA PE=1 SV=1 - [Q5HY54_HUMAN]	10.44	0.013	3	2	2	4	2607	276.4	6.05		-0.314
Q5SQ12	Prostaglandin-H2 D-isomerase OS=Homo sapiens GN=PTGDS PE=3 SV=1 - [Q5SQ12_HUMAN]	2.81	0.1	4	1	1	1	160	16.9	9.33
Q5STZ8	ATP-binding cassette sub-family F member 1 (Fragment) OS=Homo sapiens GN=ABCF1 PE=1 SV=3 - [Q5STZ8_HUMAN]	2.31	0.0324	3	1	1	1	339	38.3	5.87		-1.544
Q5T0H8	Gelsolin OS=Homo sapiens GN=GSN PE=1 SV=1 - [Q5T0H8_HUMAN]	11.39	0.1594	7	2	2	3	207	22.9	4.74		-0.408
Q5T0H9	Gelsolin OS=Homo sapiens GN=GSN PE=1 SV=1 - [Q5T0H9_HUMAN]	10.19	0.099	7	3	3	4	485	52.3	5.34		-0.411
Q5T749	Keratinocyte proline-rich protein OS=Homo sapiens GN=KPRP PE=1 SV=1 - [KPRP_HUMAN]	2.32	0.0155	1	1	1	1	579	64.1	8.27		-0.789
Q5T985	Inter-alpha-trypsin inhibitor heavy chain H2 OS=Homo sapiens GN=ITIH2 PE=1 SV=1 - [Q5T985_HUMAN]	11.64	0.0535	2	4	4	4	935	105.2	7.03		-0.284
Q5VU13	V-set and immunoglobulin domain-containing protein 8 OS=Homo sapiens GN=VSIG8 PE=1 SV=1 - [VSIG8_HUMAN]	4.79	0.0266	1	2	2	2	414	43.9	7.2	1	-0.1
Q5VY30	Retinol binding protein 4, plasma, isoform CRA_b OS=Homo sapiens GN=RBP4 PE=1 SV=2 - [Q5VY30_HUMAN]	5.79	0.1055	2	2	2	2	199	23	6.09		-0.617
Q66K74-2	Isoform 2 of Microtubule-associated protein 1S OS=Homo sapiens GN=MAP1S - [MAP1S_HUMAN]	3.04	0.0242	2	1	1	1	1033	109.7	7.65		-0.317
Q6E0U4-7	Isoform 7 of Dermokine OS=Homo sapiens GN=DMKN - [DMKN_HUMAN]	3.12	0.0461	8	1	1	1	369	35.3	6.43		-0.658
Q6EMK4	Vasorin OS=Homo sapiens GN=VASN PE=1 SV=1 - [VASN_HUMAN]	7.19	0.0371	1	2	2	3	673	71.7	7.39	1	-0.062
Q6UWP8	Suprabasin OS=Homo sapiens GN=SBSN PE=2 SV=2 - [SBSN_HUMAN]	5.88	0.1525	1	2	2	2	590	60.5	7.01		-0.687
Q6UXS9-3	Isoform 3 of Inactive caspase-12 OS=Homo sapiens GN=CASP12 - [CASPC_HUMAN]	2.77	0.0817	3	1	1	1	257	29.4	6.21		-0.384
Q70EL4-4	Isoform 4 of Ubiquitin carboxyl-terminal hydrolase 43 OS=Homo sapiens GN=USP43 - [UBP43_HUMAN]	2.32	0.017	2	1	1	1	1118	122.2	9.2		-0.489
Q71UI9-5	Isoform 5 of Histone H2A.V OS=Homo sapiens GN=H2AFV - [H2AV_HUMAN]	2.83	0.1364	19	1	1	1	66	6.9	11.06		-0.309
Q7Z5J4-3	Isoform 3 of Retinoic acid-induced protein 1 OS=Homo sapiens GN=RAI1 - [RAI1_HUMAN]	2.88	0.0165	3	1	1	1	1640	175.2	9.14		-0.768
Q86SJ6	Desmoglein-4 OS=Homo sapiens GN=DSG4 PE=1 SV=1 - [DSG4_HUMAN]	17.27	0.0279	2	2	2	6	1040	113.8	4.56	1	-0.149
Q86YZ3	Hornerin OS=Homo sapiens GN=HRNR PE=1 SV=2 - [HORN_HUMAN]	6.24	0.0246	1	2	2	2	2850	282.2	10.04		-1.364
Q8IUX7	Adipocyte enhancer-binding protein 1 OS=Homo sapiens GN=AEBP1 PE=1 SV=1 - [AEBP1_HUMAN]	11.93	0.0406	6	4	4	5	1158	130.8	5.11		-0.863
Q8TF66	Leucine-rich repeat-containing protein 15 OS=Homo sapiens GN=LRRC15 PE=1 SV=2 - [LRC15_HUMAN]	24.95	0.1274	2	7	7	9	581	64.3	6.71	1	0.023
Q92496-2	Isoform 2 of Complement factor H-related protein 4 OS=Homo sapiens GN=CFHR4 - [FHR4_HUMAN]	2.47	0.0381	3	1	1	1	577	65.2	4.97		-0.52
Q96PD5	N-acetylmuramoyl-L-alanine amidase OS=Homo sapiens GN=PGLYRP2 PE=1 SV=1 - [PGRP2_HUMAN]	3.31	0.0347	2	1	1	1	576	62.2	7.55		-0.129
Q9HCU0	Endosialin OS=Homo sapiens GN=CD248 PE=1 SV=1 - [CD248_HUMAN]	11.23	0.0436	1	3	3	4	757	80.8	5.35	1	-0.277
Q9NWT1	p21-activated protein kinase-interacting protein 1 OS=Homo sapiens GN=PAK1IP1 PE=1 SV=2 - [PK1IP_HUMAN]	3.12	0.023	1	1	1	1	392	43.9	8.91		-0.385
Q9NX08	COMM domain-containing protein 8 OS=Homo sapiens GN=COMMD8 PE=1 SV=1 - [COMD8_HUMAN]	2.29	0.0601	1	1	1	1	183	21.1	5.43		-0.318
Q9UBP9-3	Isoform 3 of PTB domain-containing engulfment adapter protein 1 OS=Homo sapiens GN=GULP1 - [GULP1_HUMAN]	2.98	0.0597	3	1	1	1	201	22.6	5.99		-0.622
Q9UI47-2	Isoform 2 of Catenin alpha-3 OS=Homo sapiens GN=CTNNA3 - [CTNA3_HUMAN]	3.09	0.0659	2	1	1	1	516	57.3	5.71		-0.271
Q9UK55	Protein Z-dependent protease inhibitor OS=Homo sapiens GN=SERPINA10 PE=1 SV=1 - [ZPI_HUMAN]	2.96	0.036	2	1	1	1	444	50.7	8.27		-0.231
Q9UNN8	Endothelial protein C receptor OS=Homo sapiens GN=PROCR PE=1 SV=1 - [EPCR_HUMAN]	5.7	0.0546	1	1	1	2	238	26.7	7.18	1	0.016
Q9Y240	C-type lectin domain family 11 member A OS=Homo sapiens GN=CLEC11A PE=1 SV=1 - [CLC11_HUMAN]	3.18	0.0341	1	1	1	1	323	35.7	5.16		-0.634
Q9Y490	Talin-1 OS=Homo sapiens GN=TLN1 PE=1 SV=3 - [TLN1_HUMAN]	2.48	0.0047	1	1	1	1	2541	269.6	6.07		-0.24
Q9Y6C2	EMILIN-1 OS=Homo sapiens GN=EMILIN1 PE=1 SV=2 - [EMIL1_HUMAN]	2.2	0.0167	1	1	1	1	1016	106.6	5.15		-0.388
Q9Y6Q9-4	Isoform 4 of Nuclear receptor coactivator 3 OS=Homo sapiens GN=NCOA3 - [NCOA3_HUMAN]	3.07	0.0237	5	1	1	1	1350	147.4	7.05		-0.759
R4GMN6	Complement C1r subcomponent (Fragment) OS=Homo sapiens GN=C1R PE=3 SV=1 - [R4GMN6_HUMAN]	10.38	0.1032	3	2	2	3	281	31.5	6.34
S4R471	Protein AMBP (Fragment) OS=Homo sapiens GN=AMBP PE=4 SV=1 - [S4R471_HUMAN]	2.83	0.0622	2	1	1	1	193	21.4	7.25		-0.312
V9GYE3	Apolipoprotein A-II OS=Homo sapiens GN=APOA2 PE=1 SV=1 - [V9GYE3_HUMAN]	8.63	0.4038	6	3	3	3	52	5.9	6.61		-0.502

## Sheet: 2
Accession	Description	Score	Coverage	# Proteins	# Unique Peptides	# Peptides	# PSMs	# AAs	MW [kDa]	calc. pI
A0A075B6J4	Protein IGLV3-25 (Fragment) OS=Homo sapiens GN=IGLV3-25 PE=4 SV=1 - [A0A075B6J4_HUMAN]	2.47	0.0893	2	1	1	1	112	12	4.5
A0A075B6K8	Ig lambda-1 chain C regions (Fragment) OS=Homo sapiens GN=IGLC1 PE=4 SV=1 - [A0A075B6K8_HUMAN]	2.85	0.1415	7	1	1	1	106	11.4	7.87
A0A075B6L0	Ig lambda-2 chain C regions (Fragment) OS=Homo sapiens GN=IGLC3 PE=4 SV=1 - [A0A075B6L0_HUMAN]	60.05	0.6509	6	1	4	18	106	11.3	7.24
A1L4H1-2	Isoform 2 of Soluble scavenger receptor cysteine-rich domain-containing protein SSC5D OS=Homo sapiens GN=SSC5D - [SRCRL_HUMAN]	2.21	0.0158	2	1	1	1	951	100.5	6.67
A6NK06	Cis-aconitate decarboxylase OS=Homo sapiens GN=IRG1 PE=1 SV=1 - [IRG1_HUMAN]	2.77	0.0832	2	1	1	1	481	52.6	7.46
C9JCK5	Proteasome subunit alpha type-2 OS=Homo sapiens GN=PSMA2 PE=1 SV=1 - [C9JCK5_HUMAN]	2.43	0.1037	2	1	1	1	164	18.6	5.99
C9JD84	Latent-transforming growth factor beta-binding protein 1 OS=Homo sapiens GN=LTBP1 PE=1 SV=1 - [C9JD84_HUMAN]	4.68	0.0134	7	1	1	2	1340	146.9	4.91
C9JEV0	Zinc-alpha-2-glycoprotein OS=Homo sapiens GN=AZGP1 PE=3 SV=1 - [C9JEV0_HUMAN]	6.84	0.0529	2	1	1	2	227	26.3	5.73
C9JMH6	Alpha-2-antiplasmin (Fragment) OS=Homo sapiens GN=SERPINF2 PE=3 SV=1 - [C9JMH6_HUMAN]	8.1	0.1333	4	3	3	3	255	27.8	6.77
C9JMX4	Insulin-like growth factor-binding protein 3 (Fragment) OS=Homo sapiens GN=IGFBP3 PE=4 SV=1 - [C9JMX4_HUMAN]	2.41	0.0606	6	1	1	1	132	14.9	8.65
C9JV37	Thrombin light chain (Fragment) OS=Homo sapiens GN=F2 PE=4 SV=1 - [C9JV37_HUMAN]	8.58	0.0401	3	1	1	3	324	35.9	4.82
C9JXX4	Insulin-like growth factor-binding protein 5 (Fragment) OS=Homo sapiens GN=IGFBP5 PE=4 SV=1 - [C9JXX4_HUMAN]	3.32	0.0687	2	1	1	1	233	25.5	7.31
D6RD17	Immunoglobulin J chain (Fragment) OS=Homo sapiens GN=IGJ PE=1 SV=2 - [D6RD17_HUMAN]	2.79	0.0955	2	1	1	1	157	18	5.6
D6RE86	Ceruloplasmin (Fragment) OS=Homo sapiens GN=CP PE=4 SV=2 - [D6RE86_HUMAN]	5.33	0.1629	3	2	2	2	178	20.7	7.24
D6RF35	Vitamin D-binding protein OS=Homo sapiens GN=GC PE=1 SV=1 - [D6RF35_HUMAN]	12.01	0.0777	6	3	3	4	476	53	5.52
D6RFL4	Monocyte differentiation antigen CD14, urinary form (Fragment) OS=Homo sapiens GN=CD14 PE=4 SV=1 - [D6RFL4_HUMAN]	2.55	0.0845	2	1	1	1	213	23.3	5.26
E5RFZ0	Activating signal cointegrator 1 complex subunit 3 (Fragment) OS=Homo sapiens GN=ASCC3 PE=4 SV=1 - [E5RFZ0_HUMAN]	3.02	0.1818	3	1	1	1	176	19.8	8.15
E5RGE1	14-3-3 protein zeta/delta (Fragment) OS=Homo sapiens GN=YWHAZ PE=1 SV=2 - [E5RGE1_HUMAN]	8.16	0.2745	7	1	1	2	51	5.8	4.78
E7ENY8	Collagen alpha-1(III) chain OS=Homo sapiens GN=COL3A1 PE=4 SV=1 - [E7ENY8_HUMAN]	3.2	0.0103	3	1	1	1	1163	111.9	5.88
E7EPG1	Multimerin-1 OS=Homo sapiens GN=MMRN1 PE=4 SV=1 - [E7EPG1_HUMAN]	2.9	0.0134	2	1	1	1	970	110.7	7.02
E7ESS4	Intercellular adhesion molecule 1 OS=Homo sapiens GN=ICAM1 PE=1 SV=1 - [E7ESS4_HUMAN]	2.44	0.0452	2	1	1	1	310	33.7	8.68
E9PB13	Kinase suppressor of Ras 2 OS=Homo sapiens GN=KSR2 PE=4 SV=1 - [E9PB13_HUMAN]	3.14	0.0337	2	1	1	1	921	104.2	8.9
E9PEV4	Apolipoprotein E (Fragment) OS=Homo sapiens GN=APOE PE=1 SV=1 - [E9PEV4_HUMAN]	2.39	0.0417	4	1	1	1	216	24.6	5.85
E9PFZ2	Ceruloplasmin OS=Homo sapiens GN=CP PE=4 SV=1 - [E9PFZ2_HUMAN]	23.17	0.074	4	6	6	8	946	108.8	5.77
E9PKK9	Dickkopf-related protein 3 (Fragment) OS=Homo sapiens GN=DKK3 PE=4 SV=1 - [E9PKK9_HUMAN]	3.17	0.1061	5	1	1	1	132	14.3	4.7
E9PS35	DIS3-like exonuclease 1 (Fragment) OS=Homo sapiens GN=DIS3L PE=4 SV=1 - [E9PS35_HUMAN]	3.16	0.1733	5	1	1	1	150	17.4	5.53
F5GXS0	Complement C4-B OS=Homo sapiens GN=C4B PE=4 SV=1 - [F5GXS0_HUMAN]	7.88	0.0153	4	2	2	3	1698	187.6	7.33
F5GY03	SPARC (Fragment) OS=Homo sapiens GN=SPARC PE=4 SV=1 - [F5GY03_HUMAN]	3.44	0.0872	2	1	1	1	149	17.5	6.28
F5H2Z5	Complement C1r subcomponent-like protein OS=Homo sapiens GN=C1RL PE=4 SV=1 - [F5H2Z5_HUMAN]	2.17	0.1273	3	1	1	1	110	11.7	9.03
F8VV32	Lysozyme C OS=Homo sapiens GN=LYZ PE=1 SV=1 - [F8VV32_HUMAN]	3.51	0.1154	2	1	1	1	104	11.5	9.07
F8VV57	Keratin, type II cytoskeletal 5 (Fragment) OS=Homo sapiens GN=KRT5 PE=1 SV=1 - [F8VV57_HUMAN]	2.3	0.1061	3	1	1	1	132	12.1	12
F8W6P5	LVV-hemorphin-7 (Fragment) OS=Homo sapiens GN=HBB PE=1 SV=1 - [F8W6P5_HUMAN]	2.96	0.1444	2	1	1	1	90	9.7	6.79
F8W9B8	Exocyst complex component 5 OS=Homo sapiens GN=EXOC5 PE=1 SV=1 - [F8W9B8_HUMAN]	2.45	0.0358	2	1	1	1	643	74.3	6.99
F8WCZ6	Complement C1s subcomponent OS=Homo sapiens GN=C1S PE=3 SV=1 - [F8WCZ6_HUMAN]	5.91	0.0422	2	2	2	2	521	57.5	5.45
G3V1A4	Cofilin 1 (Non-muscle), isoform CRA_a OS=Homo sapiens GN=CFL1 PE=1 SV=1 - [G3V1A4_HUMAN]	2.27	0.094	3	1	1	1	149	16.8	8.35
G3V5I3	Lysosomal alpha-glucosidase (Fragment) OS=Homo sapiens GN=GAA PE=4 SV=2 - [G3V5I3_HUMAN]	2.57	0.2667	2	1	1	1	45	4.7	6.49
H0Y7L5	Apolipoprotein E (Fragment) OS=Homo sapiens GN=APOE PE=1 SV=2 - [H0Y7L5_HUMAN]	4.4	0.0892	4	2	2	2	269	30.6	7.94
H0Y7Z1	Ugl-Y3 (Fragment) OS=Homo sapiens GN=FN1 PE=1 SV=1 - [H0Y7Z1_HUMAN]	2.4	0.01	16	1	1	1	1103	120.7	5.8
H0YEF4	Palmitoyltransferase (Fragment) OS=Homo sapiens GN=ZDHHC5 PE=1 SV=1 - [H0YEF4_HUMAN]	2.76	0.05	3	1	1	1	300	32.9	8.97
H0YIN9	Keratin, type II cytoskeletal 5 (Fragment) OS=Homo sapiens GN=KRT5 PE=1 SV=1 - [H0YIN9_HUMAN]	8.2	0.1122	5	1	2	3	196	22	5.16
H0YJ10	Uncharacterized protein (Fragment) OS=Homo sapiens PE=4 SV=1 - [H0YJ10_HUMAN]	3.29	0.2857	1	1	1	1	91	10.7	8.19
H0YLL2	Protein FAM227B (Fragment) OS=Homo sapiens GN=FAM227B PE=4 SV=1 - [H0YLL2_HUMAN]	3.04	0.1842	1	1	1	1	152	16.8	9.6
H0YMT1	Talin-2 (Fragment) OS=Homo sapiens GN=TLN2 PE=1 SV=1 - [H0YMT1_HUMAN]	6.54	0.0095	3	1	1	2	1471	154.6	5.26
H3BS21	Haptoglobin (Fragment) OS=Homo sapiens GN=HP PE=1 SV=1 - [H3BS21_HUMAN]	17.93	0.1306	10	3	3	5	222	24.8	6.54
H7C0L5	Inter-alpha-trypsin inhibitor heavy chain H4 (Fragment) OS=Homo sapiens GN=ITIH4 PE=1 SV=1 - [H7C0L5_HUMAN]	2.34	0.0125	6	1	1	1	719	80	5.45
H7C0N0	Inter-alpha-trypsin inhibitor heavy chain H1 (Fragment) OS=Homo sapiens GN=ITIH1 PE=4 SV=1 - [H7C0N0_HUMAN]	4.83	0.028	4	1	1	2	464	51.8	6.19
H7C5R1	Ceruloplasmin (Fragment) OS=Homo sapiens GN=CP PE=4 SV=1 - [H7C5R1_HUMAN]	4.87	0.0317	3	2	2	2	852	97.7	5.49
I6L894	Ankyrin-2 OS=Homo sapiens GN=ANK2 PE=1 SV=1 - [I6L894_HUMAN]	13.84	0.0038	2	1	1	4	3924	430	5.12
K7EKP1	Apolipoprotein C-I (Fragment) OS=Homo sapiens GN=APOC1 PE=4 SV=2 - [K7EKP1_HUMAN]	3.16	0.2453	6	1	1	1	53	5.7	4.82
M0QZW4	Delta(3,5)-Delta(2,4)-dienoyl-CoA isomerase, mitochondrial (Fragment) OS=Homo sapiens GN=ECH1 PE=1 SV=1 - [M0QZW4_HUMAN]	3.71	0.2265	4	1	1	1	181	19.8	8.75
O14548	Cytochrome c oxidase subunit 7A-related protein, mitochondrial OS=Homo sapiens GN=COX7A2L PE=1 SV=2 - [COX7R_HUMAN]	2.91	0.2105	1	1	1	1	114	12.6	9.42
O14791-3	Isoform 3 of Apolipoprotein L1 OS=Homo sapiens GN=APOL1 - [APOL1_HUMAN]	6.6	0.0395	3	1	1	2	380	42.1	5.8
O43866	CD5 antigen-like OS=Homo sapiens GN=CD5L PE=1 SV=1 - [CD5L_HUMAN]	2.77	0.072	1	1	1	1	347	38.1	5.47
O60658-6	Isoform 6 of High affinity cAMP-specific and IBMX-insensitive 3',5'-cyclic phosphodiesterase 8A OS=Homo sapiens GN=PDE8A - [PDE8A_HUMAN]	3.02	0.0277	3	1	1	1	757	86	6
O75882-3	Isoform 3 of Attractin OS=Homo sapiens GN=ATRN - [ATRN_HUMAN]	8.49	0.0242	3	2	2	3	1198	133.6	6.98
P00734	Prothrombin OS=Homo sapiens GN=F2 PE=1 SV=2 - [THRB_HUMAN]	13.91	0.0788	3	4	4	5	622	70	5.9
P00738-2	Isoform 2 of Haptoglobin OS=Homo sapiens GN=HP - [HPT_HUMAN]	21.68	0.196	8	6	6	8	347	38.4	6.6
P00751-2	Isoform 2 of Complement factor B OS=Homo sapiens GN=CFB - [CFAB_HUMAN]	2.85	0.0177	4	1	1	1	621	68.8	6.57
P01008	Antithrombin-III OS=Homo sapiens GN=SERPINC1 PE=1 SV=1 - [ANT3_HUMAN]	12.57	0.1228	1	5	5	5	464	52.6	6.71
P01009	Alpha-1-antitrypsin OS=Homo sapiens GN=SERPINA1 PE=1 SV=3 - [A1AT_HUMAN]	48.84	0.3038	7	13	13	16	418	46.7	5.59
P01009-2	Isoform 2 of Alpha-1-antitrypsin OS=Homo sapiens GN=SERPINA1 - [A1AT_HUMAN]	35.79	0.234	4	7	7	9	359	40.2	5.47
P01011	Alpha-1-antichymotrypsin OS=Homo sapiens GN=SERPINA3 PE=1 SV=2 - [AACT_HUMAN]	19.52	0.1324	3	4	4	6	423	47.6	5.52
P01019	Angiotensinogen OS=Homo sapiens GN=AGT PE=1 SV=1 - [ANGT_HUMAN]	3.9	0.0247	1	1	1	1	485	53.1	6.32
P01023	Alpha-2-macroglobulin OS=Homo sapiens GN=A2M PE=1 SV=3 - [A2MG_HUMAN]	41.98	0.1018	4	12	12	15	1474	163.2	6.46
P01024	Complement C3 OS=Homo sapiens GN=C3 PE=1 SV=2 - [CO3_HUMAN]	23.8	0.0433	3	6	6	8	1663	187	6.4
P01042-3	Isoform 3 of Kininogen-1 OS=Homo sapiens GN=KNG1 - [KNG1_HUMAN]	9.16	0.0384	3	1	1	3	391	43.8	6.43
P01593	Ig kappa chain V-I region AG OS=Homo sapiens PE=1 SV=1 - [KV101_HUMAN]	14.19	0.3148	10	2	2	4	108	12	5.99
P01596	Ig kappa chain V-I region CAR OS=Homo sapiens PE=1 SV=1 - [KV104_HUMAN]	14.62	0.1682	2	1	1	4	107	11.7	9.41
P01597	Ig kappa chain V-I region DEE OS=Homo sapiens PE=1 SV=1 - [KV105_HUMAN]	6.38	0.1667	1	1	1	2	108	11.7	9.36
P01611	Ig kappa chain V-I region Wes OS=Homo sapiens PE=1 SV=1 - [KV119_HUMAN]	7.48	0.1667	1	1	1	2	108	11.6	7.28
P01613	Ig kappa chain V-I region Ni OS=Homo sapiens PE=1 SV=1 - [KV121_HUMAN]	15.85	0.3036	1	1	2	4	112	12.2	5.36
P01620	Ig kappa chain V-III region SIE OS=Homo sapiens PE=1 SV=1 - [KV302_HUMAN]	13.36	0.3119	6	2	2	3	109	11.8	8.48
P01625	Ig kappa chain V-IV region Len OS=Homo sapiens PE=1 SV=2 - [KV402_HUMAN]	2.5	0.0789	4	1	1	1	114	12.6	7.93
P01714	Ig lambda chain V-III region SH OS=Homo sapiens PE=1 SV=1 - [LV301_HUMAN]	2.91	0.1667	1	1	1	1	108	11.4	6.52
P01717	Ig lambda chain V-IV region Hil OS=Homo sapiens PE=1 SV=1 - [LV403_HUMAN]	4.79	0.1776	1	1	1	2	107	11.5	6.51
P01719	Ig lambda chain V-V region DEL OS=Homo sapiens PE=1 SV=1 - [LV501_HUMAN]	3.13	0.1481	1	1	1	1	108	11.3	5.36
P01777	Ig heavy chain V-III region TEI OS=Homo sapiens PE=1 SV=1 - [HV316_HUMAN]	3.7	0.1597	2	1	1	1	119	12.8	8.5
P01834	Ig kappa chain C region OS=Homo sapiens GN=IGKC PE=1 SV=1 - [IGKC_HUMAN]	74.26	0.6415	2	5	5	21	106	11.6	5.87
P01857	Ig gamma-1 chain C region OS=Homo sapiens GN=IGHG1 PE=1 SV=1 - [IGHG1_HUMAN]	12.36	0.1485	1	3	4	5	330	36.1	8.19
P01859	Ig gamma-2 chain C region OS=Homo sapiens GN=IGHG2 PE=1 SV=2 - [IGHG2_HUMAN]	8.1	0.1012	4	2	3	3	326	35.9	7.59
P01871	Ig mu chain C region OS=Homo sapiens GN=IGHM PE=1 SV=3 - [IGHM_HUMAN]	19.32	0.1261	4	5	5	7	452	49.3	6.77
P01876	Ig alpha-1 chain C region OS=Homo sapiens GN=IGHA1 PE=1 SV=2 - [IGHA1_HUMAN]	8.54	0.119	1	1	3	3	353	37.6	6.51
P01877	Ig alpha-2 chain C region OS=Homo sapiens GN=IGHA2 PE=1 SV=3 - [IGHA2_HUMAN]	10.38	0.1235	2	1	3	4	340	36.5	6.1
P01880	Ig delta chain C region OS=Homo sapiens GN=IGHD PE=1 SV=2 - [IGHD_HUMAN]	2.49	0.0339	2	1	1	1	384	42.2	7.93
P02042	Hemoglobin subunit delta OS=Homo sapiens GN=HBD PE=1 SV=2 - [HBD_HUMAN]	10.79	0.2381	6	1	3	3	147	16	8.05
P02452	Collagen alpha-1(I) chain OS=Homo sapiens GN=COL1A1 PE=1 SV=5 - [CO1A1_HUMAN]	93.79	0.2268	2	17	17	30	1464	138.9	5.8
P02533	Keratin, type I cytoskeletal 14 OS=Homo sapiens GN=KRT14 PE=1 SV=4 - [K1C14_HUMAN]	10.4	0.0699	12	1	3	4	472	51.5	5.16
P02538	Keratin, type II cytoskeletal 6A OS=Homo sapiens GN=KRT6A PE=1 SV=3 - [K2C6A_HUMAN]	12.54	0.0656	9	2	3	4	564	60	8
P02647	Apolipoprotein A-I OS=Homo sapiens GN=APOA1 PE=1 SV=1 - [APOA1_HUMAN]	17.59	0.2172	2	5	5	6	267	30.8	5.76
P02649	Apolipoprotein E OS=Homo sapiens GN=APOE PE=1 SV=1 - [APOE_HUMAN]	50.74	0.3533	4	9	9	14	317	36.1	5.73
P02656	Apolipoprotein C-III OS=Homo sapiens GN=APOC3 PE=1 SV=1 - [APOC3_HUMAN]	7.72	0.1616	2	1	1	2	99	10.8	5.41
P02749	Beta-2-glycoprotein 1 OS=Homo sapiens GN=APOH PE=1 SV=3 - [APOH_HUMAN]	4.82	0.0667	3	2	2	2	345	38.3	7.97
P02750	Leucine-rich alpha-2-glycoprotein OS=Homo sapiens GN=LRG1 PE=1 SV=2 - [A2GL_HUMAN]	2.46	0.0288	1	1	1	1	347	38.2	6.95
P02760	Protein AMBP OS=Homo sapiens GN=AMBP PE=1 SV=1 - [AMBP_HUMAN]	2.95	0.0313	1	1	1	1	352	39	6.25
P02763	Alpha-1-acid glycoprotein 1 OS=Homo sapiens GN=ORM1 PE=1 SV=1 - [A1AG1_HUMAN]	2.27	0.0398	2	1	1	1	201	23.5	5.02
P02765	Alpha-2-HS-glycoprotein OS=Homo sapiens GN=AHSG PE=1 SV=1 - [FETUA_HUMAN]	9.91	0.0817	2	2	2	3	367	39.3	5.72
P02766	Transthyretin OS=Homo sapiens GN=TTR PE=1 SV=1 - [TTHY_HUMAN]	2.91	0.0884	1	1	1	1	147	15.9	5.76
P02768	Serum albumin OS=Homo sapiens GN=ALB PE=1 SV=2 - [ALBU_HUMAN]	100.01	0.2989	7	16	16	27	609	69.3	6.28
P02774-2	Isoform 2 of Vitamin D-binding protein OS=Homo sapiens GN=GC - [VTDB_HUMAN]	2.81	0.0511	4	1	1	1	352	39.5	5.26
P02787	Serotransferrin OS=Homo sapiens GN=TF PE=1 SV=3 - [TRFE_HUMAN]	59.89	0.265	6	19	19	22	698	77	7.12
P02790	Hemopexin OS=Homo sapiens GN=HPX PE=1 SV=2 - [HEMO_HUMAN]	13.67	0.1147	1	5	5	5	462	51.6	7.02
P03952	Plasma kallikrein OS=Homo sapiens GN=KLKB1 PE=1 SV=1 - [KLKB1_HUMAN]	10.67	0.0737	3	4	4	4	638	71.3	8.22
P04004	Vitronectin OS=Homo sapiens GN=VTN PE=1 SV=1 - [VTNC_HUMAN]	35.71	0.1715	2	6	6	13	478	54.3	5.8
P04114	Apolipoprotein B-100 OS=Homo sapiens GN=APOB PE=1 SV=2 - [APOB_HUMAN]	10.15	0.0105	2	4	4	4	4563	515.3	7.05
P04156-2	Isoform 2 of Major prion protein OS=Homo sapiens GN=PRNP - [PRIO_HUMAN]	6.8	0.0488	3	1	1	2	246	26.9	9.11
P04196	Histidine-rich glycoprotein OS=Homo sapiens GN=HRG PE=1 SV=1 - [HRG_HUMAN]	2.31	0.021	1	1	1	1	525	59.5	7.5
P04217	Alpha-1B-glycoprotein OS=Homo sapiens GN=A1BG PE=1 SV=4 - [A1BG_HUMAN]	64.65	0.3333	3	12	12	22	495	54.2	5.86
P04264	Keratin, type II cytoskeletal 1 OS=Homo sapiens GN=KRT1 PE=1 SV=6 - [K2C1_HUMAN]	51.09	0.2438	2	13	15	18	644	66	8.12
P04433	Ig kappa chain V-III region VG (Fragment) OS=Homo sapiens PE=1 SV=1 - [KV309_HUMAN]	4.96	0.0783	1	1	1	2	115	12.6	4.96
P05067-10	Isoform APP639 of Amyloid beta A4 protein OS=Homo sapiens GN=APP - [A4_HUMAN]	8.12	0.0376	18	2	2	3	639	72.5	4.82
P05090	Apolipoprotein D OS=Homo sapiens GN=APOD PE=1 SV=1 - [APOD_HUMAN]	5.09	0.1164	2	2	2	2	189	21.3	5.15
P05121	Plasminogen activator inhibitor 1 OS=Homo sapiens GN=SERPINE1 PE=1 SV=1 - [PAI1_HUMAN]	2.51	0.0249	1	1	1	1	402	45	7.2
P05154	Plasma serine protease inhibitor OS=Homo sapiens GN=SERPINA5 PE=1 SV=3 - [IPSP_HUMAN]	53.52	0.2463	7	8	8	17	406	45.6	9.26
P05155-2	Isoform 2 of Plasma protease C1 inhibitor OS=Homo sapiens GN=SERPING1 - [IC1_HUMAN]	26.38	0.1228	5	5	5	9	448	49.7	6.54
P05546	Heparin cofactor 2 OS=Homo sapiens GN=SERPIND1 PE=1 SV=3 - [HEP2_HUMAN]	2.34	0.018	1	1	1	1	499	57	6.9
P05997	Collagen alpha-2(V) chain OS=Homo sapiens GN=COL5A2 PE=1 SV=3 - [CO5A2_HUMAN]	4.79	0.0093	1	1	1	2	1499	144.8	6.46
P06727	Apolipoprotein A-IV OS=Homo sapiens GN=APOA4 PE=1 SV=3 - [APOA4_HUMAN]	13.89	0.0808	1	3	3	5	396	45.4	5.38
P06888	Ig lambda chain V-I region EPS OS=Homo sapiens PE=1 SV=1 - [LV109_HUMAN]	2.89	0.2661	1	1	1	1	109	11.4	9.29
P08123	Collagen alpha-2(I) chain OS=Homo sapiens GN=COL1A2 PE=1 SV=7 - [CO1A2_HUMAN]	80.07	0.2189	1	17	17	27	1366	129.2	8.95
P08185	Corticosteroid-binding globulin OS=Homo sapiens GN=SERPINA6 PE=1 SV=1 - [CBG_HUMAN]	21.26	0.1827	3	5	5	7	405	45.1	6.04
P08519	Apolipoprotein(a) OS=Homo sapiens GN=LPA PE=1 SV=1 - [APOA_HUMAN]	48.63	0.3716	1	10	10	16	4548	501	5.88
P08572	Collagen alpha-2(IV) chain OS=Homo sapiens GN=COL4A2 PE=1 SV=4 - [CO4A2_HUMAN]	2.24	0.0076	1	1	1	1	1712	167.4	8.66
P08603	Complement factor H OS=Homo sapiens GN=CFH PE=1 SV=4 - [CFAH_HUMAN]	25.52	0.0569	6	5	5	9	1231	139	6.61
P08697	Alpha-2-antiplasmin OS=Homo sapiens GN=SERPINF2 PE=1 SV=3 - [A2AP_HUMAN]	31.5	0.279	4	7	7	8	491	54.5	6.29
P08779	Keratin, type I cytoskeletal 16 OS=Homo sapiens GN=KRT16 PE=1 SV=4 - [K1C16_HUMAN]	19.71	0.1564	20	5	7	8	473	51.2	5.05
P10909-3	Isoform 3 of Clusterin OS=Homo sapiens GN=CLU - [CLUS_HUMAN]	5.4	0.0985	7	2	2	2	274	32.3	6.65
P10909-4	Isoform 4 of Clusterin OS=Homo sapiens GN=CLU - [CLUS_HUMAN]	16.13	0.1803	14	5	5	5	416	48.8	6.71
P11021	78 kDa glucose-regulated protein OS=Homo sapiens GN=HSPA5 PE=1 SV=2 - [GRP78_HUMAN]	2.4	0.0214	1	1	1	1	654	72.3	5.16
P11047	Laminin subunit gamma-1 OS=Homo sapiens GN=LAMC1 PE=1 SV=3 - [LAMC1_HUMAN]	15.74	0.036	1	4	4	5	1609	177.5	5.12
P12109	Collagen alpha-1(VI) chain OS=Homo sapiens GN=COL6A1 PE=1 SV=3 - [CO6A1_HUMAN]	12.98	0.036	1	3	3	4	1028	108.5	5.43
P12110-3	Isoform 2C2A' of Collagen alpha-2(VI) chain OS=Homo sapiens GN=COL6A2 - [CO6A2_HUMAN]	7.44	0.0399	4	3	3	3	828	87.2	5.92
P12259	Coagulation factor V OS=Homo sapiens GN=F5 PE=1 SV=4 - [FA5_HUMAN]	2.49	0.0045	1	1	1	1	2224	251.5	6.05
P13645	Keratin, type I cytoskeletal 10 OS=Homo sapiens GN=KRT10 PE=1 SV=6 - [K1C10_HUMAN]	30.09	0.1592	6	6	8	10	584	58.8	5.21
P14151	L-selectin OS=Homo sapiens GN=SELL PE=1 SV=2 - [LYAM1_HUMAN]	2.58	0.0215	2	1	1	1	372	42.2	6.6
P18065	Insulin-like growth factor-binding protein 2 OS=Homo sapiens GN=IGFBP2 PE=1 SV=2 - [IBP2_HUMAN]	13.78	0.0769	3	2	2	4	325	34.8	7.5
P19652	Alpha-1-acid glycoprotein 2 OS=Homo sapiens GN=ORM2 PE=1 SV=2 - [A1AG2_HUMAN]	33.34	0.194	1	3	5	13	201	23.6	5.11
P19827	Inter-alpha-trypsin inhibitor heavy chain H1 OS=Homo sapiens GN=ITIH1 PE=1 SV=3 - [ITIH1_HUMAN]	14.14	0.0527	5	4	4	5	911	101.3	6.79
P21810	Biglycan OS=Homo sapiens GN=BGN PE=1 SV=2 - [PGS1_HUMAN]	5.09	0.0652	2	2	2	2	368	41.6	7.52
P22692	Insulin-like growth factor-binding protein 4 OS=Homo sapiens GN=IGFBP4 PE=1 SV=2 - [IBP4_HUMAN]	7.02	0.1124	1	2	2	2	258	27.9	7.15
P22792	Carboxypeptidase N subunit 2 OS=Homo sapiens GN=CPN2 PE=1 SV=3 - [CPN2_HUMAN]	2.83	0.0294	1	1	1	1	545	60.5	5.99
P25311	Zinc-alpha-2-glycoprotein OS=Homo sapiens GN=AZGP1 PE=1 SV=2 - [ZA2G_HUMAN]	5.75	0.0738	2	2	2	2	298	34.2	6.05
P27169	Serum paraoxonase/arylesterase 1 OS=Homo sapiens GN=PON1 PE=1 SV=3 - [PON1_HUMAN]	4.26	0.0648	3	2	2	2	355	39.7	5.22
P31431-2	Isoform 2 of Syndecan-4 OS=Homo sapiens GN=SDC4 - [SDC4_HUMAN]	2.4	0.0784	2	1	1	1	153	16.5	4.22
P33151	Cadherin-5 OS=Homo sapiens GN=CDH5 PE=1 SV=5 - [CADH5_HUMAN]	7.77	0.0472	5	3	3	3	784	87.5	5.43
P33260	Cytochrome P450 2C18 OS=Homo sapiens GN=CYP2C18 PE=1 SV=3 - [CP2CI_HUMAN]	3.23	0.0469	1	1	1	1	490	55.7	7.2
P35052-2	Isoform 2 of Glypican-1 OS=Homo sapiens GN=GPC1 - [GPC1_HUMAN]	2.87	0.0488	4	1	1	1	287	31.9	7.02
P35442	Thrombospondin-2 OS=Homo sapiens GN=THBS2 PE=1 SV=2 - [TSP2_HUMAN]	2.47	0.0119	1	1	1	1	1172	129.9	4.83
P35527	Keratin, type I cytoskeletal 9 OS=Homo sapiens GN=KRT9 PE=1 SV=3 - [K1C9_HUMAN]	23.94	0.1204	2	5	5	7	623	62	5.24
P35542	Serum amyloid A-4 protein OS=Homo sapiens GN=SAA4 PE=1 SV=2 - [SAA4_HUMAN]	7.39	0.2308	1	3	3	3	130	14.7	9.07
P35555	Fibrillin-1 OS=Homo sapiens GN=FBN1 PE=1 SV=3 - [FBN1_HUMAN]	2.36	0.0031	1	1	1	1	2871	312	4.93
P35556	Fibrillin-2 OS=Homo sapiens GN=FBN2 PE=1 SV=3 - [FBN2_HUMAN]	2.57	0.0058	1	1	1	1	2912	314.6	4.86
P35858	Insulin-like growth factor-binding protein complex acid labile subunit OS=Homo sapiens GN=IGFALS PE=1 SV=1 - [ALS_HUMAN]	2.31	0.0231	2	1	1	1	605	66	6.79
P35908	Keratin, type II cytoskeletal 2 epidermal OS=Homo sapiens GN=KRT2 PE=1 SV=2 - [K22E_HUMAN]	13.17	0.0845	4	2	5	5	639	65.4	8
P36955	Pigment epithelium-derived factor OS=Homo sapiens GN=SERPINF1 PE=1 SV=4 - [PEDF_HUMAN]	13.26	0.1148	7	4	4	5	418	46.3	6.38
P37840-2	Isoform 2-4 of Alpha-synuclein OS=Homo sapiens GN=SNCA - [SYUA_HUMAN]	21.78	0.3929	6	4	4	6	112	11.4	8.29
P41587-2	Isoform 2 of Vasoactive intestinal polypeptide receptor 2 OS=Homo sapiens GN=VIPR2 - [VIPR2_HUMAN]	2.76	0.0758	1	1	1	1	422	46.7	8.15
P42685-2	Isoform 2 of Tyrosine-protein kinase FRK OS=Homo sapiens GN=FRK - [FRK_HUMAN]	2.95	0.0413	2	1	1	1	363	42	7.78
P43652	Afamin OS=Homo sapiens GN=AFM PE=1 SV=1 - [AFAM_HUMAN]	2.18	0.015	1	1	1	1	599	69	5.9
P48668	Keratin, type II cytoskeletal 6C OS=Homo sapiens GN=KRT6C PE=1 SV=3 - [K2C6C_HUMAN]	13.68	0.0816	5	3	4	5	564	60	8
P48740-4	Isoform 4 of Mannan-binding lectin serine protease 1 OS=Homo sapiens GN=MASP1 - [MASP1_HUMAN]	2.13	0.0163	2	1	1	1	615	68.9	5.34
P49788-2	Isoform 1 of Retinoic acid receptor responder protein 1 OS=Homo sapiens GN=RARRES1 - [TIG1_HUMAN]	4.42	0.0746	2	2	2	2	228	25.8	9.99
P51884	Lumican OS=Homo sapiens GN=LUM PE=1 SV=2 - [LUM_HUMAN]	5.31	0.0562	1	2	2	2	338	38.4	6.61
P52746	Zinc finger protein 142 OS=Homo sapiens GN=ZNF142 PE=2 SV=4 - [ZN142_HUMAN]	2.18	0.0053	1	1	1	1	1687	187.8	7.91
P52823	Stanniocalcin-1 OS=Homo sapiens GN=STC1 PE=1 SV=1 - [STC1_HUMAN]	3.16	0.0445	1	1	1	1	247	27.6	7.99
P55290-3	Isoform 3 of Cadherin-13 OS=Homo sapiens GN=CDH13 - [CAD13_HUMAN]	5.76	0.08	4	1	1	2	175	19.6	8.47
P55290-5	Isoform 5 of Cadherin-13 OS=Homo sapiens GN=CDH13 - [CAD13_HUMAN]	2.94	0.0178	3	1	1	1	674	73.7	4.83
P68104	Elongation factor 1-alpha 1 OS=Homo sapiens GN=EEF1A1 PE=1 SV=1 - [EF1A1_HUMAN]	2.88	0.0758	2	1	1	1	462	50.1	9.01
P68871	Hemoglobin subunit beta OS=Homo sapiens GN=HBB PE=1 SV=2 - [HBB_HUMAN]	6.91	0.2381	10	3	3	3	147	16	7.28
P69891	Hemoglobin subunit gamma-1 OS=Homo sapiens GN=HBG1 PE=1 SV=2 - [HBG1_HUMAN]	9.78	0.2381	5	2	3	3	147	16.1	7.2
P69905	Hemoglobin subunit alpha OS=Homo sapiens GN=HBA1 PE=1 SV=2 - [HBA_HUMAN]	6.53	0.1056	1	1	1	2	142	15.2	8.68
P80108	Phosphatidylinositol-glycan-specific phospholipase D OS=Homo sapiens GN=GPLD1 PE=1 SV=3 - [PHLD_HUMAN]	4.94	0.0321	1	2	2	2	840	92.3	6.37
P80748	Ig lambda chain V-III region LOI OS=Homo sapiens PE=1 SV=1 - [LV302_HUMAN]	5.83	0.1441	3	1	1	2	111	11.9	5.08
P81605	Dermcidin OS=Homo sapiens GN=DCD PE=1 SV=2 - [DCD_HUMAN]	2.79	0.1	2	1	1	1	110	11.3	6.54
Q02413	Desmoglein-1 OS=Homo sapiens GN=DSG1 PE=1 SV=2 - [DSG1_HUMAN]	4.09	0.0153	1	1	1	1	1049	113.7	5.03
Q08380	Galectin-3-binding protein OS=Homo sapiens GN=LGALS3BP PE=1 SV=1 - [LG3BP_HUMAN]	4.23	0.0393	1	2	2	2	585	65.3	5.27
Q12841-2	Isoform 2 of Follistatin-related protein 1 OS=Homo sapiens GN=FSTL1 - [FSTL1_HUMAN]	5.03	0.0733	3	2	2	2	273	31.2	5.59
Q12913-2	Isoform 2 of Receptor-type tyrosine-protein phosphatase eta OS=Homo sapiens GN=PTPRJ - [PTPRJ_HUMAN]	6.32	0.0742	2	2	2	2	539	57.2	5.6
Q14624-4	Isoform 4 of Inter-alpha-trypsin inhibitor heavy chain H4 OS=Homo sapiens GN=ITIH4 - [ITIH4_HUMAN]	11.78	0.0473	6	3	3	4	845	93.8	6.51
Q16270-2	Isoform 2 of Insulin-like growth factor-binding protein 7 OS=Homo sapiens GN=IGFBP7 - [IBP7_HUMAN]	3.2	0.0609	2	1	1	1	279	28.8	8.12
Q5JVS8	Vimentin (Fragment) OS=Homo sapiens GN=VIM PE=1 SV=1 - [Q5JVS8_HUMAN]	4.99	0.1156	4	2	2	2	173	20	4.89
Q5STZ8	ATP-binding cassette sub-family F member 1 (Fragment) OS=Homo sapiens GN=ABCF1 PE=1 SV=3 - [Q5STZ8_HUMAN]	2.49	0.0324	3	1	1	1	339	38.3	5.87
Q5T0H7	Gelsolin OS=Homo sapiens GN=GSN PE=1 SV=1 - [Q5T0H7_HUMAN]	2.34	0.0691	7	1	1	1	188	20.8	4.84
Q5T0H9	Gelsolin OS=Homo sapiens GN=GSN PE=1 SV=1 - [Q5T0H9_HUMAN]	11.05	0.099	7	3	3	4	485	52.3	5.34
Q5T985	Inter-alpha-trypsin inhibitor heavy chain H2 OS=Homo sapiens GN=ITIH2 PE=1 SV=1 - [Q5T985_HUMAN]	3.25	0.0118	2	1	1	1	935	105.2	7.03
Q5VY30	Retinol binding protein 4, plasma, isoform CRA_b OS=Homo sapiens GN=RBP4 PE=1 SV=2 - [Q5VY30_HUMAN]	3.08	0.0503	2	1	1	1	199	23	6.09
Q6EMK4	Vasorin OS=Homo sapiens GN=VASN PE=1 SV=1 - [VASN_HUMAN]	2.26	0.0223	1	1	1	1	673	71.7	7.39
Q6P1L5-2	Isoform 2 of Protein FAM117B OS=Homo sapiens GN=FAM117B - [F117B_HUMAN]	2.2	0.0623	2	1	1	1	289	29.4	11.68
Q6UXS9-3	Isoform 3 of Inactive caspase-12 OS=Homo sapiens GN=CASP12 - [CASPC_HUMAN]	3.1	0.0817	3	1	1	1	257	29.4	6.21
Q7Z7G0	Target of Nesh-SH3 OS=Homo sapiens GN=ABI3BP PE=1 SV=1 - [TARSH_HUMAN]	8.63	0.0251	9	2	2	3	1075	118.6	9.44
Q86YZ3	Hornerin OS=Homo sapiens GN=HRNR PE=1 SV=2 - [HORN_HUMAN]	3.12	0.0081	1	1	1	1	2850	282.2	10.04
Q8IUR6-2	Isoform 2 of CREB3 regulatory factor OS=Homo sapiens GN=CREBRF - [CRERF_HUMAN]	2.05	0.0384	3	1	1	1	417	46.6	4.35
Q8IUX7	Adipocyte enhancer-binding protein 1 OS=Homo sapiens GN=AEBP1 PE=1 SV=1 - [AEBP1_HUMAN]	11.91	0.0449	6	5	5	5	1158	130.8	5.11
Q8IWZ5-2	Isoform 2 of Tripartite motif-containing protein 42 OS=Homo sapiens GN=TRIM42 - [TRI42_HUMAN]	2.06	0.0379	2	1	1	1	369	42.2	7.93
Q8TBY0-2	Isoform 2 of Probable RNA-binding protein 46 OS=Homo sapiens GN=RBM46 - [RBM46_HUMAN]	2.87	0.0362	3	1	1	1	470	53.2	7.2
Q92496-2	Isoform 2 of Complement factor H-related protein 4 OS=Homo sapiens GN=CFHR4 - [FHR4_HUMAN]	2.21	0.0381	3	1	1	1	577	65.2	4.97
Q96HY3	CALM1 protein OS=Homo sapiens GN=CALM3 PE=1 SV=1 - [Q96HY3_HUMAN]	16.67	0.4779	8	3	3	5	113	12.9	4.26
Q96MC2	Dynein regulatory complex protein 1 OS=Homo sapiens GN=DRC1 PE=2 SV=2 - [DRC1_HUMAN]	2.08	0.0108	1	1	1	1	740	87.1	5.38
Q96QS6	Serine/threonine-protein kinase H2 OS=Homo sapiens GN=PSKH2 PE=2 SV=1 - [KPSH2_HUMAN]	3.58	0.0909	1	1	1	1	385	43	9.63
Q9H255	Olfactory receptor 51E2 OS=Homo sapiens GN=OR51E2 PE=2 SV=1 - [O51E2_HUMAN]	2.93	0.0406	1	1	1	1	320	35.5	8.92
Q9HC10-2	Isoform 2 of Otoferlin OS=Homo sapiens GN=OTOF - [OTOF_HUMAN]	2.91	0.0195	2	1	1	1	1230	140.2	6.24
Q9HCU0	Endosialin OS=Homo sapiens GN=CD248 PE=1 SV=1 - [CD248_HUMAN]	5.94	0.0251	1	2	2	2	757	80.8	5.35
Q9NWT1	p21-activated protein kinase-interacting protein 1 OS=Homo sapiens GN=PAK1IP1 PE=1 SV=2 - [PK1IP_HUMAN]	2.85	0.023	1	1	1	1	392	43.9	8.91
Q9UBP9-3	Isoform 3 of PTB domain-containing engulfment adapter protein 1 OS=Homo sapiens GN=GULP1 - [GULP1_HUMAN]	2.85	0.0597	3	1	1	1	201	22.6	5.99
Q9UHY1	Nuclear receptor-binding protein OS=Homo sapiens GN=NRBP1 PE=1 SV=1 - [NRBP_HUMAN]	3.72	0.0785	2	1	1	1	535	59.8	5.08
Q9UK55	Protein Z-dependent protease inhibitor OS=Homo sapiens GN=SERPINA10 PE=1 SV=1 - [ZPI_HUMAN]	8.57	0.0586	2	2	2	3	444	50.7	8.27
Q9Y240	C-type lectin domain family 11 member A OS=Homo sapiens GN=CLEC11A PE=1 SV=1 - [CLC11_HUMAN]	5.44	0.0712	2	2	2	2	323	35.7	5.16
Q9Y2F5	Little elongation complex subunit 1 OS=Homo sapiens GN=ICE1 PE=1 SV=5 - [ICE1_HUMAN]	2.76	0.0079	1	1	1	1	2266	247.7	5.48
Q9Y4X1-3	Isoform 3 of UDP-glucuronosyltransferase 2A1 OS=Homo sapiens GN=UGT2A1 - [UD2A1_HUMAN]	3.04	0.0508	5	1	1	1	492	56	8.9
Q9Y6C2	EMILIN-1 OS=Homo sapiens GN=EMILIN1 PE=1 SV=2 - [EMIL1_HUMAN]	2.21	0.0167	1	1	1	1	1016	106.6	5.15
Q9Y6R9	Coiled-coil domain-containing protein 61 OS=Homo sapiens GN=CCDC61 PE=1 SV=3 - [CCD61_HUMAN]	2.19	0.0195	1	1	1	1	512	57.3	10.27
R4GMM8	Roundabout homolog 2 (Fragment) OS=Homo sapiens GN=ROBO2 PE=4 SV=1 - [R4GMM8_HUMAN]	2.33	0.0159	5	1	1	1	1070	117.8	8.12
R4GMN6	Complement C1r subcomponent (Fragment) OS=Homo sapiens GN=C1R PE=3 SV=1 - [R4GMN6_HUMAN]	10.19	0.1032	3	2	2	3	281	31.5	6.34
S4R471	Protein AMBP (Fragment) OS=Homo sapiens GN=AMBP PE=4 SV=1 - [S4R471_HUMAN]	11.73	0.1917	2	2	2	3	193	21.4	7.25
V9GYE3	Apolipoprotein A-II OS=Homo sapiens GN=APOA2 PE=1 SV=1 - [V9GYE3_HUMAN]	4.47	0.3654	6	2	2	2	52	5.9	6.61

## Sheet: 3
Accession	Description	Score	Coverage	# Proteins	# Unique Peptides	# Peptides	# PSMs	# AAs	MW [kDa]	calc. pI
A0A075B6K8	Ig lambda-1 chain C regions (Fragment) OS=Homo sapiens GN=IGLC1 PE=4 SV=1 - [A0A075B6K8_HUMAN]	20.85	0.3208	3	1	2	6	106	11.4	7.87
A0A075B6L0	Ig lambda-2 chain C regions (Fragment) OS=Homo sapiens GN=IGLC3 PE=4 SV=1 - [A0A075B6L0_HUMAN]	35.75	0.3208	6	1	2	10	106	11.3	7.24
A1L4H1-2	Isoform 2 of Soluble scavenger receptor cysteine-rich domain-containing protein SSC5D OS=Homo sapiens GN=SSC5D - [SRCRL_HUMAN]	2.81	0.0158	2	1	1	1	951	100.5	6.67
A8MW50	L-lactate dehydrogenase (Fragment) OS=Homo sapiens GN=LDHB PE=1 SV=1 - [A8MW50_HUMAN]	17.16	0.2457	11	3	4	5	232	25.2	5.81
A8MX94	Glutathione S-transferase P OS=Homo sapiens GN=GSTP1 PE=1 SV=1 - [A8MX94_HUMAN]	2.66	0.092	2	1	1	1	174	19.5	5.97
B0YJC4	Vimentin OS=Homo sapiens GN=VIM PE=1 SV=1 - [B0YJC4_HUMAN]	132.79	0.3666	4	14	14	35	431	49.6	5.25
B1AN99	Trypsin-3 (Fragment) OS=Homo sapiens GN=PRSS3 PE=3 SV=2 - [B1AN99_HUMAN]	2.9	0.0734	6	1	1	1	177	19.3	6.07
B4DEV8	Proteasome subunit alpha type OS=Homo sapiens GN=PSMA1 PE=1 SV=1 - [B4DEV8_HUMAN]	2.68	0.0915	3	1	1	1	164	18.4	8.5
B4DJF2	14-3-3 protein epsilon OS=Homo sapiens GN=YWHAE PE=1 SV=1 - [B4DJF2_HUMAN]	5.73	0.1277	5	1	1	2	94	10.9	5.34
B4E022	Transketolase OS=Homo sapiens GN=TKT PE=1 SV=1 - [B4E022_HUMAN]	20.99	0.0903	5	3	3	6	576	62.8	7.52
B8ZZ51	Malate dehydrogenase, cytoplasmic OS=Homo sapiens GN=MDH1 PE=1 SV=1 - [B8ZZ51_HUMAN]	3.43	0.1183	6	1	1	1	169	18.7	5.94
B8ZZL8	10 kDa heat shock protein, mitochondrial OS=Homo sapiens GN=HSPE1 PE=1 SV=1 - [B8ZZL8_HUMAN]	3.01	0.1386	3	1	1	1	101	10.7	9.58
C9J0E4	Cystatin-A OS=Homo sapiens GN=CSTA PE=1 SV=1 - [C9J0E4_HUMAN]	2.47	0.1905	2	1	1	1	63	7.1	7.24
C9J3N8	Heat shock protein beta-1 OS=Homo sapiens GN=HSPB1 PE=1 SV=1 - [C9J3N8_HUMAN]	12.56	0.4595	2	1	1	4	37	3.9	5.02
C9JD84	Latent-transforming growth factor beta-binding protein 1 OS=Homo sapiens GN=LTBP1 PE=1 SV=1 - [C9JD84_HUMAN]	3.35	0.0134	7	1	1	1	1340	146.9	4.91
C9JL85	Myotrophin OS=Homo sapiens GN=MTPN PE=1 SV=1 - [C9JL85_HUMAN]	12.32	0.3269	2	1	1	3	52	5.7	4.78
C9JXX4	Insulin-like growth factor-binding protein 5 (Fragment) OS=Homo sapiens GN=IGFBP5 PE=4 SV=1 - [C9JXX4_HUMAN]	9.9	0.1159	2	2	2	3	233	25.5	7.31
D6R904	Tropomyosin alpha-3 chain OS=Homo sapiens GN=TPM3 PE=1 SV=1 - [D6R904_HUMAN]	27.4	0.5579	26	1	6	8	95	11	4.79
D6RF44	Heterogeneous nuclear ribonucleoprotein D0 (Fragment) OS=Homo sapiens GN=HNRNPD PE=1 SV=2 - [D6RF44_HUMAN]	3.3	0.1261	8	1	1	1	111	12.5	8.57
E5RGE1	14-3-3 protein zeta/delta (Fragment) OS=Homo sapiens GN=YWHAZ PE=1 SV=2 - [E5RGE1_HUMAN]	3.9	0.2745	7	1	1	1	51	5.8	4.78
E5RHG8	Transcription elongation factor B polypeptide 1 (Fragment) OS=Homo sapiens GN=TCEB1 PE=1 SV=1 - [E5RHG8_HUMAN]	3.04	0.2247	3	1	1	1	89	10	5.39
E7EPB3	60S ribosomal protein L14 OS=Homo sapiens GN=RPL14 PE=1 SV=1 - [E7EPB3_HUMAN]	2.83	0.0968	2	1	1	1	124	14.5	10.21
E7EV34	Tripeptidyl-peptidase 1 (Fragment) OS=Homo sapiens GN=TPP1 PE=4 SV=2 - [E7EV34_HUMAN]	2.9	0.1017	2	1	1	1	177	19.4	6.51
E9PHT9	Annexin OS=Homo sapiens GN=ANXA5 PE=1 SV=1 - [E9PHT9_HUMAN]	3.31	0.0982	2	1	1	1	163	18.2	5.06
E9PHW4	Fibrillin-2 OS=Homo sapiens GN=FBN2 PE=4 SV=1 - [E9PHW4_HUMAN]	6.19	0.0733	4	1	1	2	341	36.8	8.31
E9PIR7	Glycosyl-phosphatidylinositol-anchored molecule-like protein OS=Homo sapiens GN=GML PE=1 SV=1 - [E9PIR7_HUMAN]	39.99	0.139	16	5	5	11	482	53.1	6.18
E9PKB0	Sortilin-related receptor OS=Homo sapiens GN=SORL1 PE=4 SV=1 - [E9PKB0_HUMAN]	3.05	0.0229	5	1	1	1	829	92.2	6.77
E9PKE3	Heat shock cognate 71 kDa protein OS=Homo sapiens GN=HSPA8 PE=1 SV=1 - [E9PKE3_HUMAN]	14.47	0.0766	16	4	4	5	627	68.8	5.52
E9PP21	Cysteine and glycine-rich protein 1 OS=Homo sapiens GN=CSRP1 PE=1 SV=1 - [E9PP21_HUMAN]	2.67	0.0938	2	1	1	1	160	16.9	8.91
F2Z2W8	Selenium-binding protein 1 OS=Homo sapiens GN=SELENBP1 PE=1 SV=1 - [F2Z2W8_HUMAN]	9.97	0.2358	9	2	2	3	123	13.6	7.96
F5GWP8	Keratin, type I cytoskeletal 17 OS=Homo sapiens GN=KRT17 PE=1 SV=1 - [F5GWP8_HUMAN]	21.48	0.0964	14	2	5	7	591	66.3	5.19
F5GXS0	Complement C4-B OS=Homo sapiens GN=C4B PE=4 SV=1 - [F5GXS0_HUMAN]	3.8	0.0088	4	1	1	1	1698	187.6	7.33
F5GY03	SPARC (Fragment) OS=Homo sapiens GN=SPARC PE=4 SV=1 - [F5GY03_HUMAN]	29.63	0.3289	3	4	4	8	149	17.5	6.28
F5H4C6	N-acetylglucosamine-6-sulfatase (Fragment) OS=Homo sapiens GN=GNS PE=1 SV=2 - [F5H4C6_HUMAN]	2.74	0.0364	6	1	1	1	247	28.3	8.9
F8VV32	Lysozyme C OS=Homo sapiens GN=LYZ PE=1 SV=1 - [F8VV32_HUMAN]	3.16	0.1154	2	1	1	1	104	11.5	9.07
F8VV57	Keratin, type II cytoskeletal 5 (Fragment) OS=Homo sapiens GN=KRT5 PE=1 SV=1 - [F8VV57_HUMAN]	3.7	0.1061	3	1	1	1	132	12.1	12
F8VXZ7	Tubulin alpha-1A chain (Fragment) OS=Homo sapiens GN=TUBA1A PE=4 SV=1 - [F8VXZ7_HUMAN]	4.03	0.7692	18	1	1	1	26	2.7	4.89
F8VZY9	Keratin, type I cytoskeletal 18 OS=Homo sapiens GN=KRT18 PE=1 SV=1 - [F8VZY9_HUMAN]	2.57	0.0307	2	1	1	1	391	43.7	5.35
F8W1K5	Protein canopy homolog 2 (Fragment) OS=Homo sapiens GN=CNPY2 PE=4 SV=1 - [F8W1K5_HUMAN]	2.74	0.1569	4	1	1	1	102	11.7	4.56
F8W6P5	LVV-hemorphin-7 (Fragment) OS=Homo sapiens GN=HBB PE=1 SV=1 - [F8W6P5_HUMAN]	9.51	0.3556	2	2	2	3	90	9.7	6.79
F8WCZ6	Complement C1s subcomponent OS=Homo sapiens GN=C1S PE=3 SV=1 - [F8WCZ6_HUMAN]	13.92	0.0729	4	3	3	5	521	57.5	5.45
F8WE04	Heat shock protein beta-1 OS=Homo sapiens GN=HSPB1 PE=1 SV=1 - [F8WE04_HUMAN]	5.68	0.0538	2	1	1	2	186	20.4	9.06
F8WE65	Peptidyl-prolyl cis-trans isomerase OS=Homo sapiens GN=PPIA PE=1 SV=1 - [F8WE65_HUMAN]	16.47	0.225	4	2	2	5	120	13	6.77
F8WE98	Filamin-A (Fragment) OS=Homo sapiens GN=FLNA PE=1 SV=2 - [F8WE98_HUMAN]	9.83	0.0281	4	1	1	3	604	66.6	8.95
G3V2E8	Alpha-actinin-1 (Fragment) OS=Homo sapiens GN=ACTN1 PE=1 SV=1 - [G3V2E8_HUMAN]	2.68	0.1647	14	1	1	1	85	9.3	8.5
G3V3A0	Alpha-1-antichymotrypsin OS=Homo sapiens GN=SERPINA3 PE=3 SV=1 - [G3V3A0_HUMAN]	2.53	0.0488	2	1	1	1	205	23.4	5.64
G3V511	Latent-transforming growth factor beta-binding protein 2 OS=Homo sapiens GN=LTBP2 PE=4 SV=1 - [G3V511_HUMAN]	3.08	0.0073	3	1	1	1	1769	189.1	5.4
G3V5X6	Heterogeneous nuclear ribonucleoproteins C1/C2 (Fragment) OS=Homo sapiens GN=HNRNPC PE=1 SV=1 - [G3V5X6_HUMAN]	3.67	0.1368	14	1	1	1	117	12.8	9.5
G3XAL0	Malate dehydrogenase OS=Homo sapiens GN=MDH2 PE=1 SV=1 - [G3XAL0_HUMAN]	3.4	0.0693	3	1	1	1	231	24.6	7.99
H0Y8L3	Transforming growth factor-beta-induced protein ig-h3 (Fragment) OS=Homo sapiens GN=TGFBI PE=4 SV=1 - [H0Y8L3_HUMAN]	14.45	0.1421	4	4	4	5	366	39.9	6.86
H0YBT4	Dihydropyrimidinase-related protein 3 (Fragment) OS=Homo sapiens GN=DPYSL3 PE=1 SV=1 - [H0YBT4_HUMAN]	3.22	0.0766	8	1	1	1	209	21.9	8.16
H0YCU9	Transgelin (Fragment) OS=Homo sapiens GN=TAGLN PE=1 SV=1 - [H0YCU9_HUMAN]	5.4	0.1656	3	2	2	2	151	16.8	9.36
H0YFX9	Histone H2A (Fragment) OS=Homo sapiens GN=H2AFJ PE=3 SV=1 - [H0YFX9_HUMAN]	28.44	0.5217	14	2	2	8	92	10	9.7
H0YJ11	Alpha-actinin-1 (Fragment) OS=Homo sapiens GN=ACTN1 PE=1 SV=1 - [H0YJ11_HUMAN]	10.93	0.1304	7	2	2	3	207	24.4	5.59
H0YJ31	Fibulin-5 (Fragment) OS=Homo sapiens GN=FBLN5 PE=4 SV=1 - [H0YJ31_HUMAN]	13.57	0.0892	4	1	1	4	157	17.6	8.57
H0YKX5	Tropomyosin alpha-1 chain (Fragment) OS=Homo sapiens GN=TPM1 PE=1 SV=1 - [H0YKX5_HUMAN]	29.44	0.3451	30	2	7	9	142	16.4	4.74
H0YN67	Immunoglobulin superfamily-containing leucine-rich repeat protein (Fragment) OS=Homo sapiens GN=ISLR PE=4 SV=1 - [H0YN67_HUMAN]	2.65	0.0748	3	1	1	1	147	16.2	5.43
H3BUH7	Fructose-bisphosphate aldolase A (Fragment) OS=Homo sapiens GN=ALDOA PE=1 SV=1 - [H3BUH7_HUMAN]	3.05	0.0903	6	1	1	1	155	16.9	8.56
H3BV48	PEX (Fragment) OS=Homo sapiens GN=MMP2 PE=4 SV=1 - [H3BV48_HUMAN]	12.31	0.161	5	1	1	3	118	13.6	5.52
H7BY82	Collagen alpha-1(V) chain (Fragment) OS=Homo sapiens GN=COL5A1 PE=4 SV=1 - [H7BY82_HUMAN]	4.06	0.0857	2	1	1	1	210	23.6	5.16
H7BZ56	Synaptojanin-1 (Fragment) OS=Homo sapiens GN=SYNJ1 PE=1 SV=1 - [H7BZ56_HUMAN]	3.42	0.229	8	1	1	1	131	13.4	9.98
H7BZJ3	Protein disulfide-isomerase A3 (Fragment) OS=Homo sapiens GN=PDIA3 PE=1 SV=1 - [H7BZJ3_HUMAN]	12.92	0.2358	1	1	2	4	123	13.5	7.3
H7C5R1	Ceruloplasmin (Fragment) OS=Homo sapiens GN=CP PE=4 SV=1 - [H7C5R1_HUMAN]	2.81	0.0141	3	1	1	1	852	97.7	5.49
I3L239	Heat shock protein 75 kDa, mitochondrial (Fragment) OS=Homo sapiens GN=TRAP1 PE=1 SV=1 - [I3L239_HUMAN]	5.74	0.0651	7	1	1	2	215	24.9	9.31
I3NI03	Protein disulfide-isomerase (Fragment) OS=Homo sapiens GN=P4HB PE=1 SV=1 - [I3NI03_HUMAN]	7.11	0.0964	5	1	1	2	166	18.5	6.11
J3QSA3	Ubiquitin (Fragment) OS=Homo sapiens GN=UBB PE=4 SV=1 - [J3QSA3_HUMAN]	14.34	0.6744	25	2	2	5	43	4.9	5.19
K7EKL3	Paragranulin (Fragment) OS=Homo sapiens GN=GRN PE=4 SV=1 - [K7EKL3_HUMAN]	8.39	0.0593	5	2	2	3	388	41.3	6.52
K7ELW0	Protein DJ-1 OS=Homo sapiens GN=PARK7 PE=1 SV=1 - [K7ELW0_HUMAN]	9.22	0.0888	2	1	1	4	169	17.9	7.87
K7EM20	14-3-3 protein epsilon (Fragment) OS=Homo sapiens GN=YWHAE PE=1 SV=1 - [K7EM20_HUMAN]	7.8	0.1478	3	1	1	2	115	12.9	4.59
K7EMS3	Keratin, type I cytoskeletal 19 (Fragment) OS=Homo sapiens GN=KRT19 PE=1 SV=1 - [K7EMS3_HUMAN]	17.25	0.2431	2	2	2	4	181	20.2	4.6
K7EQ48	Glucose-6-phosphate isomerase OS=Homo sapiens GN=GPI PE=1 SV=2 - [K7EQ48_HUMAN]	28.9	0.1603	5	5	5	9	474	53.4	8.68
K7ESA6	Glutaryl-CoA dehydrogenase, mitochondrial (Fragment) OS=Homo sapiens GN=GCDH PE=4 SV=1 - [K7ESA6_HUMAN]	3.21	0.3103	1	1	1	1	116	12.8	8.51
K7ESE1	Keratin, type I cytoskeletal 17 (Fragment) OS=Homo sapiens GN=KRT17 PE=4 SV=1 - [K7ESE1_HUMAN]	3.74	0.1368	4	1	1	1	95	11	4.65
M0R042	Tubulin beta-4A chain (Fragment) OS=Homo sapiens GN=TUBB4A PE=3 SV=1 - [M0R042_HUMAN]	3.36	0.0833	11	1	1	1	144	15.8	4.77
M0R081	C-type lectin domain family 11 member A OS=Homo sapiens GN=CLEC11A PE=4 SV=1 - [M0R081_HUMAN]	2.7	0.0379	2	1	1	1	317	33.5	7.36
M0R0F0	40S ribosomal protein S5 (Fragment) OS=Homo sapiens GN=RPS5 PE=1 SV=1 - [M0R0F0_HUMAN]	2.51	0.07	3	1	1	1	200	22.4	9.55
M0R0W6	Tyrosine-protein kinase receptor UFO OS=Homo sapiens GN=AXL PE=1 SV=1 - [M0R0W6_HUMAN]	3.47	0.0176	3	1	1	1	626	69.2	5.53
O00391-2	Isoform 2 of Sulfhydryl oxidase 1 OS=Homo sapiens GN=QSOX1 - [QSOX1_HUMAN]	5.47	0.053	3	2	2	2	604	66.8	8.56
O14786-3	Isoform 3 of Neuropilin-1 OS=Homo sapiens GN=NRP1 - [NRP1_HUMAN]	6.56	0.0443	8	2	2	2	609	68.3	6.16
O15230	Laminin subunit alpha-5 OS=Homo sapiens GN=LAMA5 PE=1 SV=8 - [LAMA5_HUMAN]	6.18	0.0087	1	2	2	2	3695	399.5	7.02
O43707-2	Isoform ACTN4ISO of Alpha-actinin-4 OS=Homo sapiens GN=ACTN4 - [ACTN4_HUMAN]	19.79	0.0679	8	3	3	5	692	79.9	5.17
O43852-8	Isoform 8 of Calumenin OS=Homo sapiens GN=CALU - [CALU_HUMAN]	5.7	0.1244	15	2	2	2	201	23.5	4.72
O75369-5	Isoform 5 of Filamin-B OS=Homo sapiens GN=FLNB - [FLNB_HUMAN]	11.83	0.0186	10	3	3	4	2146	230.1	5.54
O75882-3	Isoform 3 of Attractin OS=Homo sapiens GN=ATRN - [ATRN_HUMAN]	3.09	0.0109	3	1	1	1	1198	133.6	6.98
O95965	Integrin beta-like protein 1 OS=Homo sapiens GN=ITGBL1 PE=2 SV=1 - [ITGBL_HUMAN]	16.58	0.083	4	3	3	5	494	53.9	5.64
P00338-5	Isoform 5 of L-lactate dehydrogenase A chain OS=Homo sapiens GN=LDHA - [LDHA_HUMAN]	7.07	0.1079	14	1	2	2	241	26.7	8.15
P00441	Superoxide dismutase [Cu-Zn] OS=Homo sapiens GN=SOD1 PE=1 SV=2 - [SODC_HUMAN]	12.48	0.2273	2	2	2	3	154	15.9	6.13
P00505-2	Isoform 2 of Aspartate aminotransferase, mitochondrial OS=Homo sapiens GN=GOT2 - [AATM_HUMAN]	9.51	0.0672	2	2	2	3	387	43	9.29
P00558-2	Isoform 2 of Phosphoglycerate kinase 1 OS=Homo sapiens GN=PGK1 - [PGK1_HUMAN]	21.16	0.1311	3	3	3	6	389	41.4	7.33
P00736	Complement C1r subcomponent OS=Homo sapiens GN=C1R PE=1 SV=2 - [C1R_HUMAN]	84.18	0.2426	11	10	10	23	705	80.1	6.21
P00738-2	Isoform 2 of Haptoglobin OS=Homo sapiens GN=HP - [HPT_HUMAN]	13.05	0.1412	10	3	3	4	347	38.4	6.6
P00751	Complement factor B OS=Homo sapiens GN=CFB PE=1 SV=2 - [CFAB_HUMAN]	11.75	0.0406	6	2	2	3	764	85.5	7.06
P00751-2	Isoform 2 of Complement factor B OS=Homo sapiens GN=CFB - [CFAB_HUMAN]	12.9	0.0403	4	2	2	4	621	68.8	6.57
P01008	Antithrombin-III OS=Homo sapiens GN=SERPINC1 PE=1 SV=1 - [ANT3_HUMAN]	9.38	0.0905	1	3	3	3	464	52.6	6.71
P01009	Alpha-1-antitrypsin OS=Homo sapiens GN=SERPINA1 PE=1 SV=3 - [A1AT_HUMAN]	33.68	0.2057	6	6	6	10	418	46.7	5.59
P01019	Angiotensinogen OS=Homo sapiens GN=AGT PE=1 SV=1 - [ANGT_HUMAN]	5.75	0.0247	1	1	1	2	485	53.1	6.32
P01023	Alpha-2-macroglobulin OS=Homo sapiens GN=A2M PE=1 SV=3 - [A2MG_HUMAN]	26.31	0.036	3	4	4	8	1474	163.2	6.46
P01024	Complement C3 OS=Homo sapiens GN=C3 PE=1 SV=2 - [CO3_HUMAN]	17.78	0.0325	2	4	4	5	1663	187	6.4
P01040	Cystatin-A OS=Homo sapiens GN=CSTA PE=1 SV=1 - [CYTA_HUMAN]	7.61	0.1837	1	1	1	2	98	11	5.5
P01042-3	Isoform 3 of Kininogen-1 OS=Homo sapiens GN=KNG1 - [KNG1_HUMAN]	3.56	0.0384	3	1	1	1	391	43.8	6.43
P01620	Ig kappa chain V-III region SIE OS=Homo sapiens PE=1 SV=1 - [KV302_HUMAN]	6.89	0.1651	4	1	1	2	109	11.8	8.48
P01777	Ig heavy chain V-III region TEI OS=Homo sapiens PE=1 SV=1 - [HV316_HUMAN]	8.94	0.1597	2	1	1	2	119	12.8	8.5
P01834	Ig kappa chain C region OS=Homo sapiens GN=IGKC PE=1 SV=1 - [IGKC_HUMAN]	28.49	0.1698	1	1	1	8	106	11.6	5.87
P01857	Ig gamma-1 chain C region OS=Homo sapiens GN=IGHG1 PE=1 SV=1 - [IGHG1_HUMAN]	26.26	0.2424	3	4	5	8	330	36.1	8.19
P01861	Ig gamma-4 chain C region OS=Homo sapiens GN=IGHG4 PE=1 SV=1 - [IGHG4_HUMAN]	6	0.1009	2	1	2	2	327	35.9	7.36
P01871	Ig mu chain C region OS=Homo sapiens GN=IGHM PE=1 SV=3 - [IGHM_HUMAN]	5.23	0.0354	3	1	1	2	452	49.3	6.77
P01876	Ig alpha-1 chain C region OS=Homo sapiens GN=IGHA1 PE=1 SV=2 - [IGHA1_HUMAN]	2.61	0.0425	1	1	1	1	353	37.6	6.51
P01877	Ig alpha-2 chain C region OS=Homo sapiens GN=IGHA2 PE=1 SV=3 - [IGHA2_HUMAN]	6.3	0.05	2	1	1	2	340	36.5	6.1
P02452	Collagen alpha-1(I) chain OS=Homo sapiens GN=COL1A1 PE=1 SV=5 - [CO1A1_HUMAN]	249.01	0.429	2	34	34	68	1464	138.9	5.8
P02461	Collagen alpha-1(III) chain OS=Homo sapiens GN=COL3A1 PE=1 SV=4 - [CO3A1_HUMAN]	21.09	0.0416	3	4	4	6	1466	138.5	6.61
P02462	Collagen alpha-1(IV) chain OS=Homo sapiens GN=COL4A1 PE=1 SV=3 - [CO4A1_HUMAN]	9.74	0.0246	2	2	2	3	1669	160.5	8.28
P02533	Keratin, type I cytoskeletal 14 OS=Homo sapiens GN=KRT14 PE=1 SV=4 - [K1C14_HUMAN]	75.46	0.3093	20	8	12	21	472	51.5	5.16
P02538	Keratin, type II cytoskeletal 6A OS=Homo sapiens GN=KRT6A PE=1 SV=3 - [K2C6A_HUMAN]	26.47	0.1543	8	2	7	9	564	60	8
P02647	Apolipoprotein A-I OS=Homo sapiens GN=APOA1 PE=1 SV=1 - [APOA1_HUMAN]	14.62	0.1161	2	3	3	4	267	30.8	5.76
P02751-10	Isoform 10 of Fibronectin OS=Homo sapiens GN=FN1 - [FINC_HUMAN]	61.96	0.0841	19	10	10	17	2176	239.5	5.88
P02751-12	Isoform 12 of Fibronectin OS=Homo sapiens GN=FN1 - [FINC_HUMAN]	29.34	0.0398	18	5	5	8	2008	221.2	6.18
P02751-17	Isoform 17 of Fibronectin OS=Homo sapiens GN=FN1 - [FINC_HUMAN]	497.29	0.2979	19	46	46	132	2330	256.3	5.8
P02765	Alpha-2-HS-glycoprotein OS=Homo sapiens GN=AHSG PE=1 SV=1 - [FETUA_HUMAN]	2.89	0.0354	1	1	1	1	367	39.3	5.72
P02766	Transthyretin OS=Homo sapiens GN=TTR PE=1 SV=1 - [TTHY_HUMAN]	3.23	0.0884	1	1	1	1	147	15.9	5.76
P02768	Serum albumin OS=Homo sapiens GN=ALB PE=1 SV=2 - [ALBU_HUMAN]	162.87	0.3432	7	22	22	51	609	69.3	6.28
P02787	Serotransferrin OS=Homo sapiens GN=TF PE=1 SV=3 - [TRFE_HUMAN]	10.89	0.0544	2	3	3	3	698	77	7.12
P02790	Hemopexin OS=Homo sapiens GN=HPX PE=1 SV=2 - [HEMO_HUMAN]	5.13	0.0476	1	2	2	2	462	51.6	7.02
P02792	Ferritin light chain OS=Homo sapiens GN=FTL PE=1 SV=2 - [FRIL_HUMAN]	6.25	0.0857	1	1	1	2	175	20	5.78
P03956	Interstitial collagenase OS=Homo sapiens GN=MMP1 PE=1 SV=3 - [MMP1_HUMAN]	6.64	0.0277	1	1	1	2	469	54	6.96
P04179-3	Isoform 3 of Superoxide dismutase [Mn], mitochondrial OS=Homo sapiens GN=SOD2 - [SODM_HUMAN]	22.91	0.1728	7	2	2	7	162	18.2	8.41
P04259	Keratin, type II cytoskeletal 6B OS=Homo sapiens GN=KRT6B PE=1 SV=5 - [K2C6B_HUMAN]	42.47	0.1738	3	1	7	13	564	60	8
P04264	Keratin, type II cytoskeletal 1 OS=Homo sapiens GN=KRT1 PE=1 SV=6 - [K2C1_HUMAN]	285.6	0.4891	2	24	27	74	644	66	8.12
P04350	Tubulin beta-4A chain OS=Homo sapiens GN=TUBB4A PE=1 SV=2 - [TBB4A_HUMAN]	6.03	0.0563	24	2	2	2	444	49.6	4.88
P05121-2	Isoform 2 of Plasminogen activator inhibitor 1 OS=Homo sapiens GN=SERPINE1 - [PAI1_HUMAN]	22.6	0.1008	2	2	2	7	387	43.4	7.17
P05155-2	Isoform 2 of Plasma protease C1 inhibitor OS=Homo sapiens GN=SERPING1 - [IC1_HUMAN]	14.79	0.0313	4	1	1	4	448	49.7	6.54
P05787	Keratin, type II cytoskeletal 8 OS=Homo sapiens GN=KRT8 PE=1 SV=7 - [K2C8_HUMAN]	98.21	0.0994	6	4	4	30	483	53.7	5.59
P05997	Collagen alpha-2(V) chain OS=Homo sapiens GN=COL5A2 PE=1 SV=3 - [CO5A2_HUMAN]	6.68	0.028	1	2	2	2	1499	144.8	6.46
P06396-2	Isoform 2 of Gelsolin OS=Homo sapiens GN=GSN - [GELS_HUMAN]	12.34	0.0438	7	2	2	4	731	80.6	5.85
P06727	Apolipoprotein A-IV OS=Homo sapiens GN=APOA4 PE=1 SV=3 - [APOA4_HUMAN]	2.69	0.0253	1	1	1	1	396	45.4	5.38
P06733-2	Isoform MBP-1 of Alpha-enolase OS=Homo sapiens GN=ENO1 - [ENOA_HUMAN]	24.82	0.1056	3	2	2	6	341	36.9	6.28
P07355	Annexin A2 OS=Homo sapiens GN=ANXA2 PE=1 SV=2 - [ANXA2_HUMAN]	56.66	0.3097	25	9	9	16	339	38.6	7.75
P07585-2	Isoform B of Decorin OS=Homo sapiens GN=DCN - [PGS2_HUMAN]	3.76	0.052	2	1	1	1	250	27.3	7.43
P07737	Profilin-1 OS=Homo sapiens GN=PFN1 PE=1 SV=2 - [PROF1_HUMAN]	27.01	0.3286	3	4	4	8	140	15	8.27
P07942	Laminin subunit beta-1 OS=Homo sapiens GN=LAMB1 PE=1 SV=2 - [LAMB1_HUMAN]	17.19	0.0269	3	3	3	5	1786	197.9	4.94
P07954-2	Isoform Cytoplasmic of Fumarate hydratase, mitochondrial OS=Homo sapiens GN=FH - [FUMH_HUMAN]	3.79	0.0385	2	1	1	1	467	50.2	7.4
P07996-2	Isoform 2 of Thrombospondin-1 OS=Homo sapiens GN=THBS1 - [TSP1_HUMAN]	14.05	0.0378	2	3	3	4	1085	120.1	4.88
P08123	Collagen alpha-2(I) chain OS=Homo sapiens GN=COL1A2 PE=1 SV=7 - [CO1A2_HUMAN]	359.39	0.4568	1	36	36	91	1366	129.2	8.95
P08253-2	Isoform 2 of 72 kDa type IV collagenase OS=Homo sapiens GN=MMP2 - [MMP2_HUMAN]	20.88	0.1045	6	5	5	7	584	65.7	5.22
P08519	Apolipoprotein(a) OS=Homo sapiens GN=LPA PE=1 SV=1 - [APOA_HUMAN]	5.91	0.1849	1	2	2	2	4548	501	5.88
P08603	Complement factor H OS=Homo sapiens GN=CFH PE=1 SV=4 - [CFAH_HUMAN]	20.59	0.0658	3	5	5	6	1231	139	6.61
P08727	Keratin, type I cytoskeletal 19 OS=Homo sapiens GN=KRT19 PE=1 SV=4 - [K1C19_HUMAN]	82.94	0.305	3	7	7	23	400	44.1	5.14
P08779	Keratin, type I cytoskeletal 16 OS=Homo sapiens GN=KRT16 PE=1 SV=4 - [K1C16_HUMAN]	24.17	0.1564	23	1	7	9	473	51.2	5.05
P09382	Galectin-1 OS=Homo sapiens GN=LGALS1 PE=1 SV=2 - [LEG1_HUMAN]	14.06	0.3185	1	3	3	4	135	14.7	5.5
P09871	Complement C1s subcomponent OS=Homo sapiens GN=C1S PE=1 SV=1 - [C1S_HUMAN]	38.28	0.1453	5	8	8	11	688	76.6	4.96
P10599-2	Isoform 2 of Thioredoxin OS=Homo sapiens GN=TXN - [THIO_HUMAN]	2.92	0.1529	2	1	1	1	85	9.4	6.04
P10909-4	Isoform 4 of Clusterin OS=Homo sapiens GN=CLU - [CLUS_HUMAN]	9.94	0.1298	14	3	3	3	416	48.8	6.71
P11021	78 kDa glucose-regulated protein OS=Homo sapiens GN=HSPA5 PE=1 SV=2 - [GRP78_HUMAN]	11.84	0.026	1	1	1	3	654	72.3	5.16
P11047	Laminin subunit gamma-1 OS=Homo sapiens GN=LAMC1 PE=1 SV=3 - [LAMC1_HUMAN]	84.47	0.1237	1	14	14	24	1609	177.5	5.12
P12109	Collagen alpha-1(VI) chain OS=Homo sapiens GN=COL6A1 PE=1 SV=3 - [CO6A1_HUMAN]	51.71	0.1284	1	8	8	13	1028	108.5	5.43
P12110-3	Isoform 2C2A' of Collagen alpha-2(VI) chain OS=Homo sapiens GN=COL6A2 - [CO6A2_HUMAN]	6.23	0.0374	4	2	2	2	828	87.2	5.92
P12111-3	Isoform 3 of Collagen alpha-3(VI) chain OS=Homo sapiens GN=COL6A3 - [CO6A3_HUMAN]	3.63	0.0154	6	1	1	1	1036	113.2	5.76
P12111-4	Isoform 4 of Collagen alpha-3(VI) chain OS=Homo sapiens GN=COL6A3 - [CO6A3_HUMAN]	40.4	0.0424	6	7	7	11	2570	278	8.15
P12955-3	Isoform 3 of Xaa-Pro dipeptidase OS=Homo sapiens GN=PEPD - [PEPD_HUMAN]	5.55	0.0233	3	1	1	2	429	47.2	6.07
P13489	Ribonuclease inhibitor OS=Homo sapiens GN=RNH1 PE=1 SV=2 - [RINI_HUMAN]	6.51	0.0651	5	2	2	2	461	49.9	4.82
P13645	Keratin, type I cytoskeletal 10 OS=Homo sapiens GN=KRT10 PE=1 SV=6 - [K1C10_HUMAN]	218.07	0.3219	5	14	16	56	584	58.8	5.21
P13647	Keratin, type II cytoskeletal 5 OS=Homo sapiens GN=KRT5 PE=1 SV=3 - [K2C5_HUMAN]	53.45	0.2	7	7	9	17	590	62.3	7.74
P13667	Protein disulfide-isomerase A4 OS=Homo sapiens GN=PDIA4 PE=1 SV=2 - [PDIA4_HUMAN]	2.6	0.0186	1	1	1	1	645	72.9	5.07
P13797-3	Isoform 3 of Plastin-3 OS=Homo sapiens GN=PLS3 - [PLST_HUMAN]	7.73	0.0444	6	2	2	3	585	65.6	6.3
P14618-3	Isoform 3 of Pyruvate kinase PKM OS=Homo sapiens GN=PKM - [KPYM_HUMAN]	3.43	0.0426	2	1	1	1	516	56.2	8.44
P14923	Junction plakoglobin OS=Homo sapiens GN=JUP PE=1 SV=3 - [PLAK_HUMAN]	14.47	0.051	5	3	3	5	745	81.7	6.14
P15144	Aminopeptidase N OS=Homo sapiens GN=ANPEP PE=1 SV=4 - [AMPN_HUMAN]	6.09	0.0134	1	1	1	2	967	109.5	5.48
P15151-3	Isoform Gamma of Poliovirus receptor OS=Homo sapiens GN=PVR - [PVR_HUMAN]	5.36	0.0687	4	2	2	2	364	39.3	6.21
P15289-2	Isoform 2 of Arylsulfatase A OS=Homo sapiens GN=ARSA - [ARSA_HUMAN]	3.14	0.0402	2	1	1	1	423	44.9	5.87
P15531	Nucleoside diphosphate kinase A OS=Homo sapiens GN=NME1 PE=1 SV=1 - [NDKA_HUMAN]	12.62	0.2039	9	2	2	4	152	17.1	6.19
P15924	Desmoplakin OS=Homo sapiens GN=DSP PE=1 SV=3 - [DESP_HUMAN]	8.61	0.0104	3	3	3	3	2871	331.6	6.81
P15924-2	Isoform DPII of Desmoplakin OS=Homo sapiens GN=DSP - [DESP_HUMAN]	3.15	0.0079	3	1	1	1	2272	260	6.96
P16035	Metalloproteinase inhibitor 2 OS=Homo sapiens GN=TIMP2 PE=1 SV=2 - [TIMP2_HUMAN]	27.18	0.1591	2	4	4	8	220	24.4	7.49
P17096	High mobility group protein HMG-I/HMG-Y OS=Homo sapiens GN=HMGA1 PE=1 SV=3 - [HMGA1_HUMAN]	6.38	0.2336	2	1	1	2	107	11.7	10.32
P18065	Insulin-like growth factor-binding protein 2 OS=Homo sapiens GN=IGFBP2 PE=1 SV=2 - [IBP2_HUMAN]	15.2	0.1754	4	4	4	5	325	34.8	7.5
P20618	Proteasome subunit beta type-1 OS=Homo sapiens GN=PSMB1 PE=1 SV=2 - [PSB1_HUMAN]	9.33	0.1411	1	2	2	3	241	26.5	8.13
P20908	Collagen alpha-1(V) chain OS=Homo sapiens GN=COL5A1 PE=1 SV=3 - [CO5A1_HUMAN]	8.96	0.0261	1	2	2	2	1838	183.4	5.06
P20933	N(4)-(beta-N-acetylglucosaminyl)-L-asparaginase OS=Homo sapiens GN=AGA PE=1 SV=2 - [ASPG_HUMAN]	3.94	0.0896	1	1	1	1	346	37.2	6.28
P21333-2	Isoform 2 of Filamin-A OS=Homo sapiens GN=FLNA - [FLNA_HUMAN]	59.29	0.0739	6	10	10	17	2639	279.8	6.05
P21810	Biglycan OS=Homo sapiens GN=BGN PE=1 SV=2 - [PGS1_HUMAN]	16.53	0.0707	1	3	3	5	368	41.6	7.52
P22692	Insulin-like growth factor-binding protein 4 OS=Homo sapiens GN=IGFBP4 PE=1 SV=2 - [IBP4_HUMAN]	16.51	0.2248	1	4	4	5	258	27.9	7.15
P23142	Fibulin-1 OS=Homo sapiens GN=FBLN1 PE=1 SV=4 - [FBLN1_HUMAN]	29.13	0.0996	6	2	4	8	703	77.2	5.22
P23142-2	Isoform A of Fibulin-1 OS=Homo sapiens GN=FBLN1 - [FBLN1_HUMAN]	3.39	0.0177	5	1	1	1	566	61.5	4.93
P23142-4	Isoform C of Fibulin-1 OS=Homo sapiens GN=FBLN1 - [FBLN1_HUMAN]	24.48	0.0776	7	1	3	6	683	74.4	5.24
P23284	Peptidyl-prolyl cis-trans isomerase B OS=Homo sapiens GN=PPIB PE=1 SV=2 - [PPIB_HUMAN]	2.8	0.0602	1	1	1	1	216	23.7	9.41
P24592	Insulin-like growth factor-binding protein 6 OS=Homo sapiens GN=IGFBP6 PE=1 SV=1 - [IBP6_HUMAN]	15.87	0.1042	2	2	2	5	240	25.3	7.81
P26022	Pentraxin-related protein PTX3 OS=Homo sapiens GN=PTX3 PE=1 SV=3 - [PTX3_HUMAN]	33.08	0.1916	1	5	5	10	381	41.9	5.01
P26641	Elongation factor 1-gamma OS=Homo sapiens GN=EEF1G PE=1 SV=3 - [EF1G_HUMAN]	3.31	0.032	2	1	1	1	437	50.1	6.67
P28066-2	Isoform 2 of Proteasome subunit alpha type-5 OS=Homo sapiens GN=PSMA5 - [PSA5_HUMAN]	7.48	0.1038	2	1	1	2	183	20	4.73
P29084	Transcription initiation factor IIE subunit beta OS=Homo sapiens GN=GTF2E2 PE=1 SV=1 - [T2EB_HUMAN]	3.17	0.0653	1	1	1	1	291	33	9.66
P29966	Myristoylated alanine-rich C-kinase substrate OS=Homo sapiens GN=MARCKS PE=1 SV=4 - [MARCS_HUMAN]	2.45	0.0452	1	1	1	1	332	31.5	4.45
P30086	Phosphatidylethanolamine-binding protein 1 OS=Homo sapiens GN=PEBP1 PE=1 SV=3 - [PEBP1_HUMAN]	12	0.1872	1	2	2	3	187	21	7.53
P30101	Protein disulfide-isomerase A3 OS=Homo sapiens GN=PDIA3 PE=1 SV=4 - [PDIA3_HUMAN]	12.6	0.0812	1	2	3	4	505	56.7	6.35
P31949	Protein S100-A11 OS=Homo sapiens GN=S100A11 PE=1 SV=2 - [S10AB_HUMAN]	7.79	0.1524	1	1	1	2	105	11.7	7.12
P33908	Mannosyl-oligosaccharide 1,2-alpha-mannosidase IA OS=Homo sapiens GN=MAN1A1 PE=1 SV=3 - [MA1A1_HUMAN]	2.53	0.0168	1	1	1	1	653	72.9	6.47
P35052-2	Isoform 2 of Glypican-1 OS=Homo sapiens GN=GPC1 - [GPC1_HUMAN]	6.61	0.0488	4	1	1	2	287	31.9	7.02
P35237	Serpin B6 OS=Homo sapiens GN=SERPINB6 PE=1 SV=3 - [SPB6_HUMAN]	11.23	0.1197	1	3	3	4	376	42.6	5.27
P35442	Thrombospondin-2 OS=Homo sapiens GN=THBS2 PE=1 SV=2 - [TSP2_HUMAN]	30.44	0.0742	1	5	5	8	1172	129.9	4.83
P35527	Keratin, type I cytoskeletal 9 OS=Homo sapiens GN=KRT9 PE=1 SV=3 - [K1C9_HUMAN]	273.85	0.4446	2	18	18	65	623	62	5.24
P35579	Myosin-9 OS=Homo sapiens GN=MYH9 PE=1 SV=4 - [MYH9_HUMAN]	9.86	0.0082	1	2	2	3	1960	226.4	5.6
P35908	Keratin, type II cytoskeletal 2 epidermal OS=Homo sapiens GN=KRT2 PE=1 SV=2 - [K22E_HUMAN]	161.54	0.5086	4	18	21	41	639	65.4	8
P36222	Chitinase-3-like protein 1 OS=Homo sapiens GN=CHI3L1 PE=1 SV=2 - [CH3L1_HUMAN]	11.69	0.0966	2	2	2	3	383	42.6	8.46
P36955	Pigment epithelium-derived factor OS=Homo sapiens GN=SERPINF1 PE=1 SV=4 - [PEDF_HUMAN]	68.64	0.3373	9	10	10	19	418	46.3	6.38
P39059	Collagen alpha-1(XV) chain OS=Homo sapiens GN=COL15A1 PE=1 SV=2 - [COFA1_HUMAN]	13.39	0.0122	1	1	1	4	1388	141.6	5
P40926-2	Isoform 2 of Malate dehydrogenase, mitochondrial OS=Homo sapiens GN=MDH2 - [MDHM_HUMAN]	6.87	0.1182	3	2	2	2	296	30.9	8.43
P48668	Keratin, type II cytoskeletal 6C OS=Homo sapiens GN=KRT6C PE=1 SV=3 - [K2C6C_HUMAN]	40.09	0.156	4	1	6	12	564	60	8
P49721	Proteasome subunit beta type-2 OS=Homo sapiens GN=PSMB2 PE=1 SV=1 - [PSB2_HUMAN]	2.92	0.0746	1	1	1	1	201	22.8	7.02
P50395-2	Isoform 2 of Rab GDP dissociation inhibitor beta OS=Homo sapiens GN=GDI2 - [GDIB_HUMAN]	10.73	0.0775	5	2	2	3	400	45.6	6.24
P50454	Serpin H1 OS=Homo sapiens GN=SERPINH1 PE=1 SV=2 - [SERPH_HUMAN]	12.47	0.1268	13	3	3	4	418	46.4	8.69
P51884	Lumican OS=Homo sapiens GN=LUM PE=1 SV=2 - [LUM_HUMAN]	12.84	0.0947	1	2	2	4	338	38.4	6.61
P55268	Laminin subunit beta-2 OS=Homo sapiens GN=LAMB2 PE=1 SV=2 - [LAMB2_HUMAN]	61.1	0.0851	2	12	12	18	1798	195.9	6.52
P60174-1	Isoform 2 of Triosephosphate isomerase OS=Homo sapiens GN=TPI1 - [TPIS_HUMAN]	18.15	0.1727	5	3	3	5	249	26.7	6.9
P60709	Actin, cytoplasmic 1 OS=Homo sapiens GN=ACTB PE=1 SV=1 - [ACTB_HUMAN]	51.62	0.288	23	4	6	14	375	41.7	5.48
P61769	Beta-2-microglobulin OS=Homo sapiens GN=B2M PE=1 SV=1 - [B2MG_HUMAN]	3.25	0.1849	2	1	1	1	119	13.7	6.52
P61981	14-3-3 protein gamma OS=Homo sapiens GN=YWHAG PE=1 SV=2 - [1433G_HUMAN]	6.96	0.0567	1	1	1	2	247	28.3	4.89
P62158	Calmodulin OS=Homo sapiens GN=CALM1 PE=1 SV=2 - [CALM_HUMAN]	17.46	0.2215	9	2	2	5	149	16.8	4.22
P62328	Thymosin beta-4 OS=Homo sapiens GN=TMSB4X PE=1 SV=2 - [TYB4_HUMAN]	2.97	0.2727	1	1	1	1	44	5	5.06
P63104	14-3-3 protein zeta/delta OS=Homo sapiens GN=YWHAZ PE=1 SV=1 - [1433Z_HUMAN]	14.6	0.1306	11	2	2	3	245	27.7	4.79
P67936	Tropomyosin alpha-4 chain OS=Homo sapiens GN=TPM4 PE=1 SV=3 - [TPM4_HUMAN]	43.65	0.2782	20	4	9	13	248	28.5	4.69
P68104	Elongation factor 1-alpha 1 OS=Homo sapiens GN=EEF1A1 PE=1 SV=1 - [EF1A1_HUMAN]	2.69	0.0238	3	1	1	1	462	50.1	9.01
P69905	Hemoglobin subunit alpha OS=Homo sapiens GN=HBA1 PE=1 SV=2 - [HBA_HUMAN]	10.67	0.1056	1	1	1	3	142	15.2	8.68
P80748	Ig lambda chain V-III region LOI OS=Homo sapiens PE=1 SV=1 - [LV302_HUMAN]	13.78	0.1441	3	1	1	4	111	11.9	5.08
P81605	Dermcidin OS=Homo sapiens GN=DCD PE=1 SV=2 - [DCD_HUMAN]	12.41	0.2273	2	2	2	4	110	11.3	6.54
P98160	Basement membrane-specific heparan sulfate proteoglycan core protein OS=Homo sapiens GN=HSPG2 PE=1 SV=4 - [PGBM_HUMAN]	18.85	0.0116	1	4	4	6	4391	468.5	6.51
P98160	Basement membrane-specific heparan sulfate proteoglycan core protein OS=Homo sapiens GN=HSPG2 PE=1 SV=4 - [PGBM_HUMAN]	32.3	0.0219	3	7	7	10	4391	468.5	6.51
Q01082-3	Isoform 2 of Spectrin beta chain, non-erythrocytic 1 OS=Homo sapiens GN=SPTBN1 - [SPTB2_HUMAN]	2.9	0.0079	3	1	1	1	2155	251.2	5.53
Q02413	Desmoglein-1 OS=Homo sapiens GN=DSG1 PE=1 SV=2 - [DSG1_HUMAN]	19.06	0.0334	1	2	2	5	1049	113.7	5.03
Q02818	Nucleobindin-1 OS=Homo sapiens GN=NUCB1 PE=1 SV=4 - [NUCB1_HUMAN]	17.34	0.0759	5	4	4	6	461	53.8	5.25
Q04695	Keratin, type I cytoskeletal 17 OS=Homo sapiens GN=KRT17 PE=1 SV=2 - [K1C17_HUMAN]	6.33	0.0579	4	1	2	2	432	48.1	5.02
Q07954	Prolow-density lipoprotein receptor-related protein 1 OS=Homo sapiens GN=LRP1 PE=1 SV=2 - [LRP1_HUMAN]	3.82	0.0029	1	1	1	1	4544	504.3	5.39
Q08380	Galectin-3-binding protein OS=Homo sapiens GN=LGALS3BP PE=1 SV=1 - [LG3BP_HUMAN]	30.12	0.0752	5	3	3	8	585	65.3	5.27
Q08397	Lysyl oxidase homolog 1 OS=Homo sapiens GN=LOXL1 PE=1 SV=2 - [LOXL1_HUMAN]	14.11	0.0348	1	1	1	4	574	63.1	7.52
Q12805-5	Isoform 5 of EGF-containing fibulin-like extracellular matrix protein 1 OS=Homo sapiens GN=EFEMP1 - [FBLN3_HUMAN]	22.47	0.1775	5	4	4	7	355	39.2	6.49
Q12841-2	Isoform 2 of Follistatin-related protein 1 OS=Homo sapiens GN=FSTL1 - [FSTL1_HUMAN]	13.01	0.1026	2	2	2	4	273	31.2	5.59
Q13835-2	Isoform 1 of Plakophilin-1 OS=Homo sapiens GN=PKP1 - [PKP1_HUMAN]	5.67	0.0207	2	1	1	2	726	80.4	8.97
Q14112-2	Isoform 2 of Nidogen-2 OS=Homo sapiens GN=NID2 - [NID2_HUMAN]	13.67	0.0314	3	3	3	4	1274	140.8	5.33
Q14118	Dystroglycan OS=Homo sapiens GN=DAG1 PE=1 SV=2 - [DAG1_HUMAN]	6.41	0.0346	4	2	2	2	895	97.4	8.56
Q14241	Transcription elongation factor B polypeptide 3 OS=Homo sapiens GN=TCEB3 PE=1 SV=2 - [ELOA1_HUMAN]	2.49	0.0175	1	1	1	1	798	89.9	9.57
Q14315-2	Isoform 2 of Filamin-C OS=Homo sapiens GN=FLNC - [FLNC_HUMAN]	2.9	0.0067	2	1	1	1	2692	287.1	5.97
Q14956-2	Isoform 2 of Transmembrane glycoprotein NMB OS=Homo sapiens GN=GPNMB - [GPNMB_HUMAN]	16.04	0.0321	2	1	1	4	560	62.6	6.64
Q14CN4-3	Isoform 3 of Keratin, type II cytoskeletal 72 OS=Homo sapiens GN=KRT72 - [K2C72_HUMAN]	10.19	0.0576	9	1	2	3	469	51.1	6.46
Q15113	Procollagen C-endopeptidase enhancer 1 OS=Homo sapiens GN=PCOLCE PE=1 SV=2 - [PCOC1_HUMAN]	38.01	0.2138	1	6	6	11	449	47.9	7.43
Q15293-2	Isoform 2 of Reticulocalbin-1 OS=Homo sapiens GN=RCN1 - [RCN1_HUMAN]	6.08	0.0679	2	2	2	2	280	33	5.02
Q16270-2	Isoform 2 of Insulin-like growth factor-binding protein 7 OS=Homo sapiens GN=IGFBP7 - [IBP7_HUMAN]	29.81	0.233	2	4	4	9	279	28.8	8.12
Q16363-2	Isoform 2 of Laminin subunit alpha-4 OS=Homo sapiens GN=LAMA4 - [LAMA4_HUMAN]	36.1	0.0529	6	8	8	11	1816	201.6	6.32
Q1JUQ5	Peptidyl-prolyl cis-trans isomerase OS=Homo sapiens GN=FKBP12-Exip2 PE=1 SV=1 - [Q1JUQ5_HUMAN]	6.67	0.1522	3	1	1	2	92	10.1	5.9
Q4LDE5-3	Isoform 3 of Sushi, von Willebrand factor type A, EGF and pentraxin domain-containing protein 1 OS=Homo sapiens GN=SVEP1 - [SVEP1_HUMAN]	3.76	0.0107	3	1	1	1	1497	163.5	5.57
Q5D862	Filaggrin-2 OS=Homo sapiens GN=FLG2 PE=1 SV=1 - [FILA2_HUMAN]	22.74	0.0514	1	4	4	5	2391	247.9	8.31
Q5H9B4	Metalloproteinase inhibitor 1 (Fragment) OS=Homo sapiens GN=TIMP1 PE=1 SV=2 - [Q5H9B4_HUMAN]	3.62	0.1263	4	1	1	1	95	10.6	7.87
Q5HY54	Filamin-A OS=Homo sapiens GN=FLNA PE=1 SV=1 - [Q5HY54_HUMAN]	36.45	0.0529	4	7	7	10	2607	276.4	6.05
Q5SQ12	Prostaglandin-H2 D-isomerase OS=Homo sapiens GN=PTGDS PE=3 SV=1 - [Q5SQ12_HUMAN]	11.29	0.1	4	1	1	3	160	16.9	9.33
Q5SRN7	HLA class I histocompatibility antigen, A-68 alpha chain OS=Homo sapiens GN=HLA-A PE=1 SV=2 - [Q5SRN7_HUMAN]	3.38	0.0468	42	1	1	1	299	34.2	5.67
Q5T3N1	Annexin (Fragment) OS=Homo sapiens GN=ANXA1 PE=1 SV=1 - [Q5T3N1_HUMAN]	3.67	0.0784	2	1	1	1	204	22.7	5.53
Q5T8M8	Actin, alpha skeletal muscle OS=Homo sapiens GN=ACTA1 PE=3 SV=1 - [Q5T8M8_HUMAN]	16	0.1463	17	1	3	5	287	32	5.41
Q5TCI8	Prelamin-A/C OS=Homo sapiens GN=LMNA PE=1 SV=1 - [Q5TCI8_HUMAN]	17.58	0.0896	7	3	3	5	491	55.7	7.02
Q6EMK4	Vasorin OS=Homo sapiens GN=VASN PE=1 SV=1 - [VASN_HUMAN]	5.62	0.0223	1	1	1	2	673	71.7	7.39
Q6UWP8	Suprabasin OS=Homo sapiens GN=SBSN PE=2 SV=2 - [SBSN_HUMAN]	3.26	0.0915	1	1	1	1	590	60.5	7.01
Q6UXS9-3	Isoform 3 of Inactive caspase-12 OS=Homo sapiens GN=CASP12 - [CASPC_HUMAN]	3.56	0.0817	3	1	1	1	257	29.4	6.21
Q7Z7G0	Target of Nesh-SH3 OS=Homo sapiens GN=ABI3BP PE=1 SV=1 - [TARSH_HUMAN]	18.61	0.0335	9	2	2	4	1075	118.6	9.44
Q86YZ3	Hornerin OS=Homo sapiens GN=HRNR PE=1 SV=2 - [HORN_HUMAN]	68.15	0.14	1	12	12	18	2850	282.2	10.04
Q8IUX7-2	Isoform 2 of Adipocyte enhancer-binding protein 1 OS=Homo sapiens GN=AEBP1 - [AEBP1_HUMAN]	16.08	0.0218	2	1	1	5	733	82.1	5.05
Q92743	Serine protease HTRA1 OS=Homo sapiens GN=HTRA1 PE=1 SV=1 - [HTRA1_HUMAN]	3.17	0.0229	1	1	1	1	480	51.3	7.83
Q92820	Gamma-glutamyl hydrolase OS=Homo sapiens GN=GGH PE=1 SV=2 - [GGH_HUMAN]	8.19	0.044	1	1	1	2	318	35.9	7.11
Q96EY1-3	Isoform 3 of DnaJ homolog subfamily A member 3, mitochondrial OS=Homo sapiens GN=DNAJA3 - [DNJA3_HUMAN]	3.07	0.09	3	1	1	1	300	33.1	8.81
Q99715-4	Isoform 4 of Collagen alpha-1(XII) chain OS=Homo sapiens GN=COL12A1 - [COCA1_HUMAN]	93.72	0.086	6	18	18	28	2987	324.4	5.5
Q9BRK5-4	Isoform 4 of 45 kDa calcium-binding protein OS=Homo sapiens GN=SDF4 - [CAB45_HUMAN]	5.35	0.0594	6	1	1	2	202	23	6.29
Q9C091-3	Isoform 3 of GREB1-like protein OS=Homo sapiens GN=GREB1L - [GRB1L_HUMAN]	2.5	0.0066	2	1	1	1	1814	202	6.67
Q9HAT2-2	Isoform 2 of Sialate O-acetylesterase OS=Homo sapiens GN=SIAE - [SIAE_HUMAN]	3.34	0.0246	2	1	1	1	488	54.5	7.33
Q9HCU0	Endosialin OS=Homo sapiens GN=CD248 PE=1 SV=1 - [CD248_HUMAN]	6.42	0.0251	1	1	1	2	757	80.8	5.35
Q9P273	Teneurin-3 OS=Homo sapiens GN=TENM3 PE=2 SV=3 - [TEN3_HUMAN]	3.03	0.0078	1	1	1	1	2699	300.8	6.42
Q9UBG0	C-type mannose receptor 2 OS=Homo sapiens GN=MRC2 PE=1 SV=2 - [MRC2_HUMAN]	6.67	0.0176	1	2	2	2	1479	166.6	5.83
Q9UBP4	Dickkopf-related protein 3 OS=Homo sapiens GN=DKK3 PE=1 SV=2 - [DKK3_HUMAN]	10.65	0.0686	5	2	2	3	350	38.4	4.65
Q9UBP9-3	Isoform 3 of PTB domain-containing engulfment adapter protein 1 OS=Homo sapiens GN=GULP1 - [GULP1_HUMAN]	2.48	0.0597	3	1	1	1	201	22.6	5.99
Q9Y617	Phosphoserine aminotransferase OS=Homo sapiens GN=PSAT1 PE=1 SV=2 - [SERC_HUMAN]	5.66	0.0649	2	2	2	2	370	40.4	7.66
Q9Y646	Carboxypeptidase Q OS=Homo sapiens GN=CPQ PE=1 SV=1 - [CBPQ_HUMAN]	2.87	0.0191	1	1	1	1	472	51.9	6.18
R4GMN6	Complement C1r subcomponent (Fragment) OS=Homo sapiens GN=C1R PE=3 SV=1 - [R4GMN6_HUMAN]	3.92	0.0498	3	1	1	1	281	31.5	6.34
